# Supplementary material for: Triterpenic Acids as Non-Competitive α-Glucosidase Inhibitors from Boswellia elongata with Structure-Activity Relationship: In Vitro and In Silico Studies
Source: Biomolecules. 2020 May 12;10(5):751. doi: 10.3390/biom10050751 (PMC7278020; doi:10.3390/biom10050751)
Supplement: Supplementary file 1 [file biomolecules-10-00751-s001.pdf]

## SUPPLEMENTARY MATERIALS

### **$\alpha$ -Glucosidase inhibitory activity of triterpenic acids from *Boswellia elongata* with structure-activity relationship: In vitro and in silico studies**

Najeeb Ur Rehman<sup>a</sup>, Mohammed Al-Azri<sup>a</sup>, Ajmal Khan<sup>a</sup>, Sobia Ahsan Halim<sup>a</sup>, Zahra Al-Abri<sup>a</sup>, Ahmed Al-Rawahi<sup>a</sup>, Rene Csuk<sup>b</sup> and Ahmed Al-Harrasi<sup>a\*</sup>

<sup>a</sup>*Natural & Medical Sciences Research Center, University of Nizwa, P.O Box 33, Postal Code 616, Birkat Al Mauz, Nizwa, Sultanate of Oman*

<sup>b</sup>*Martin-Luther-University Halle-Wittenberg, Organic Chemistry, Kurt-Mothes-Str. 2, D-06120 Halle (Saale) Germany*

**\*Corresponding author (A. Al-Harrasi)**

Natural & Medical Sciences Research Center, University of Nizwa, P.O Box 33, Postal Code 616, Birkat Al Mauz, Nizwa, Sultanate of Oman (phone: +96825446328; e-mail: [aharrasi@unizwa.edu.om](mailto:aharrasi@unizwa.edu.om))

**Table S1. Docking scores and binding interactions of Compounds 3-5 and 11 on the predicted allosteric sites**

| Sites | Compounds |              |                     |        |                            |                    |                            |       |                            |        |     |                    |
|-------|-----------|--------------|---------------------|--------|----------------------------|--------------------|----------------------------|-------|----------------------------|--------|-----|--------------------|
|       | 3         |              |                     | 4      |                            | 5                  |                            | 11    |                            |        |     |                    |
|       | Score     | Interactions |                     | Score  | Interactions               | Score              | Interactions               | Score | Interactions               |        |     |                    |
|       |           | Lig. Rec.    | Interaction Dis.    |        | Lig. Rec. Interaction Dis. |                    | Lig. Rec. Interaction Dis. |       | Lig. Rec. Interaction Dis. |        |     |                    |
| AS-1  | -8.54     | O77          | NZ-LYS262 HBA 2.92  | -10.8  | O79                        | NZ-LYS15 HBA 3.23  | -9.58                      | O70   | O-ILE271 HBD 2.70          | -9.99  | O79 | OE1-GLU10 HBD 2.67 |
| AS_2  | -5.18     | O84          | ND2-ASN335 HBA 2.66 | -6.71  | O76                        | O-LEU332 HBD 3.12  | -4.68                      | O78   | O-ASN335 HBD 3.07          | -6.67  | O79 | O-LEU332 HBD 3.00  |
| AS-3  | -6.91     | O84          | ND2-ASN335 HBA 2.47 | -7.05  | O75                        | NE2-GLN HBA 2.58   | -7.23                      | O70   | NE2-GLN513 HBA 3.07        | -7.88  | SE  |                    |
| AS-4  | -8.5      | O84          | N-ARG180 HBA 3.03   | -10.57 | O76                        | OG-SER179 HBD 3.08 | -9.38                      | O70   | OE1-GLU414 HBD 2.98        | -9.27  | O78 | NE-ARG180 HBA 3.22 |
|       |           | O79          | N-SER179 HBA 3.43   |        |                            |                    |                            |       |                            |        |     |                    |
| AS-5  | -7.93     | O77          | NZ-LYS 236 HBA 2.65 | -8.30  | O75                        | NZ-LYS418 HBA 2.95 | -8.24                      | O70   | OG-SER235 HBD 2.64         | -8.34  | O78 | NZ-LYS418 HBA 3.22 |
|       |           | O77          | N-LYS236 HBA 2.31   |        |                            |                    |                            |       |                            |        |     |                    |
| AS-6  | -6.84     | SE           |                     | -7.32  | SE                         |                    | -7.74                      | SE    |                            | -7.93  | SE  |                    |
| Cav 1 | -9.83     | O77          | NZ-LYS15 HBA 3.21   | -10.77 | O75                        | N-ILE271 HBA 3.00  | -10.21                     | O70   | O-HIS258 HBD 3.26          | -10.69 | O78 | N-ILE271 HBA 2.85  |
| Cav 2 | -8.71     | O84          | NZ-LYS418 HBA 2.72  | -10.73 | O79                        | N-SER179 HBA 3.01  | -9.60                      | O77   | ND2-ASN411 HBA 2.58        | -9.98  | O81 | N-SER179 HBA 2.97  |

Lig = ligand, Rec = receptor, Dis = distance, Cav = cavity, HBA= Hydrogen bond acceptor, HBD = Hydrogen bond donor, SE = Surface Exposed

## Representative NMR and HRMS spectra of the isolated compounds

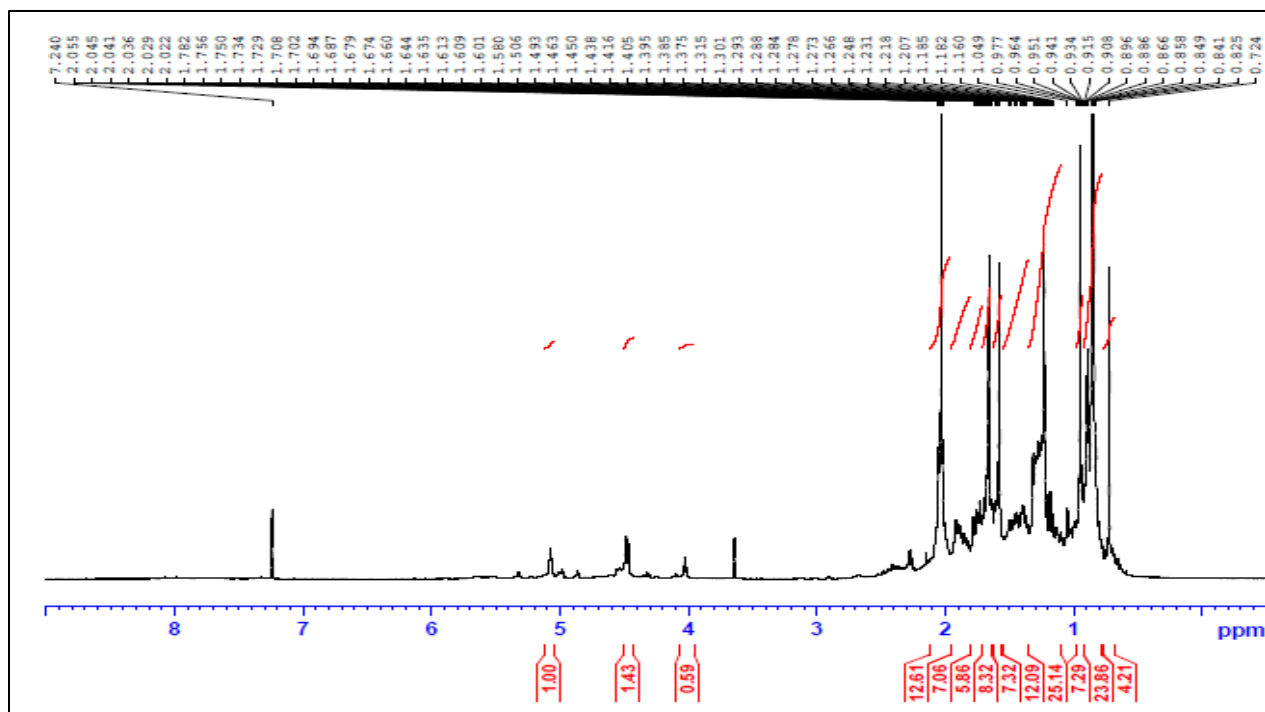

Figure S1. <sup>1</sup>H-NMR (600 MHz, CDCl<sub>3</sub>) of compound 1

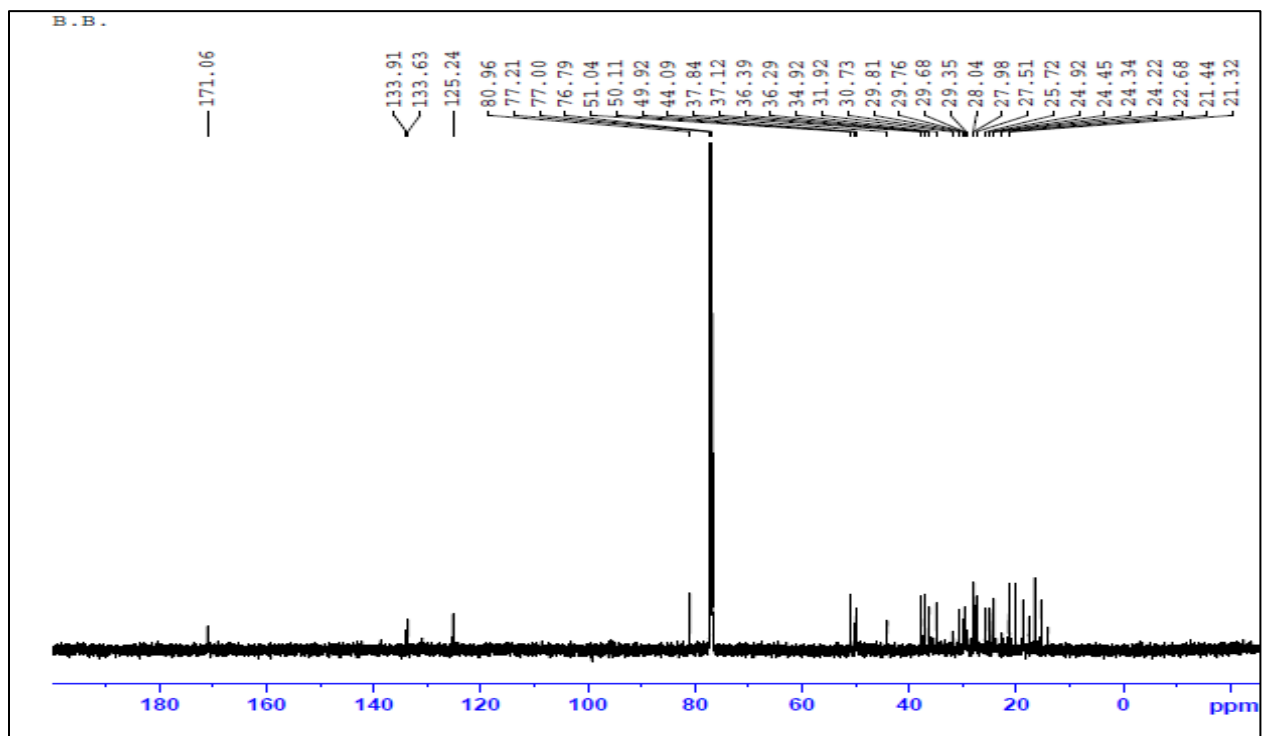

Figure S2. <sup>13</sup>C-NMR (150 MHz, CDCl<sub>3</sub>) of compound 1

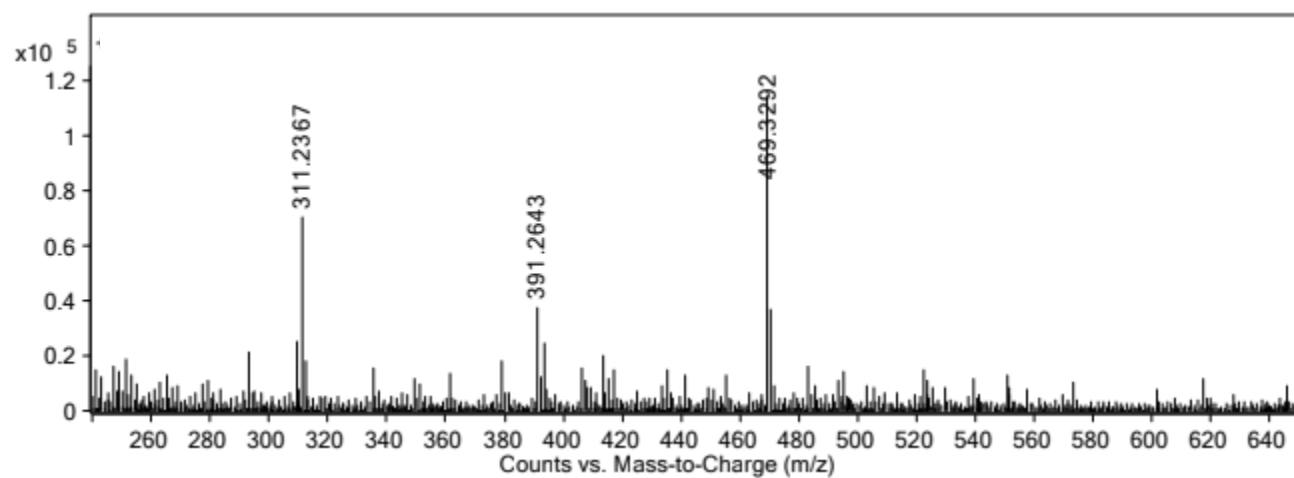

**Figure S3.** HRMS (ESI<sup>+</sup>) of compound **1**

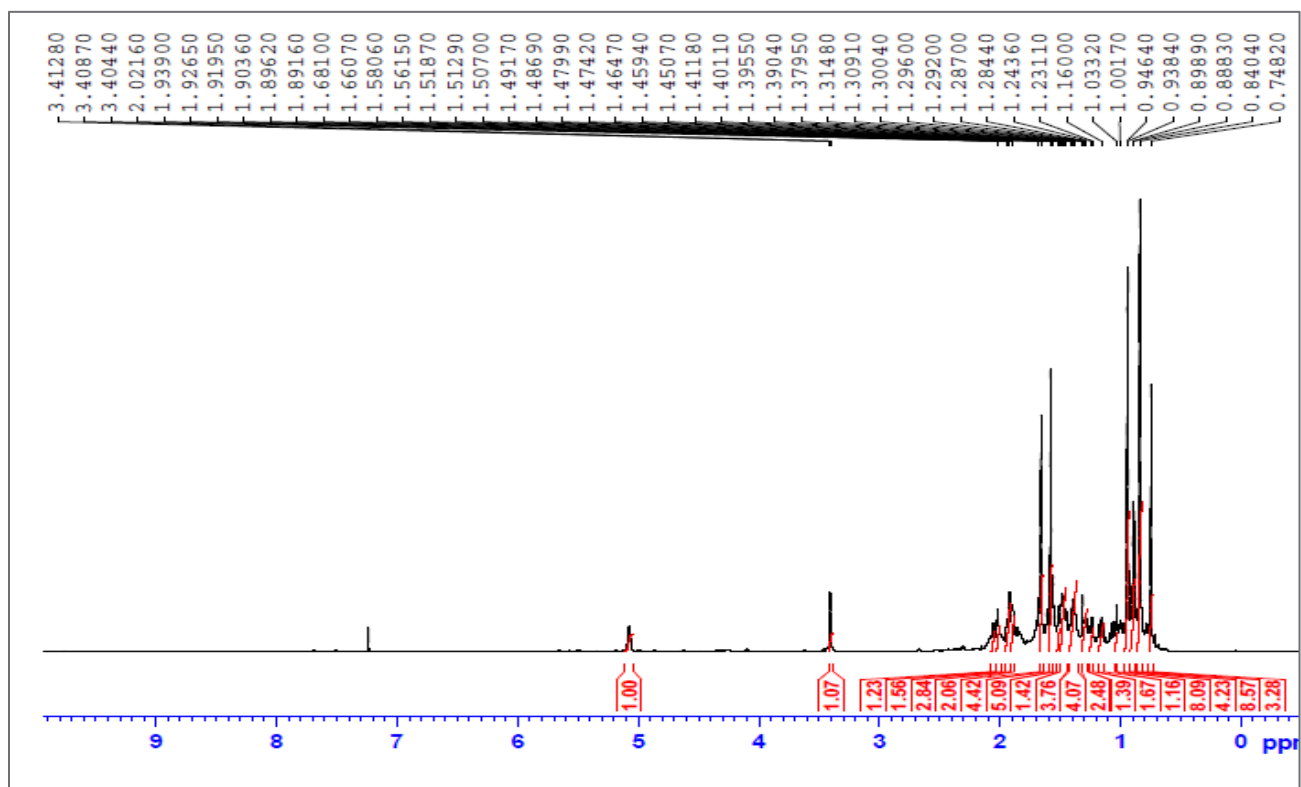

**Figure S4.** <sup>1</sup>H-NMR (600 MHz, CDCl<sub>3</sub>) of compound **2**

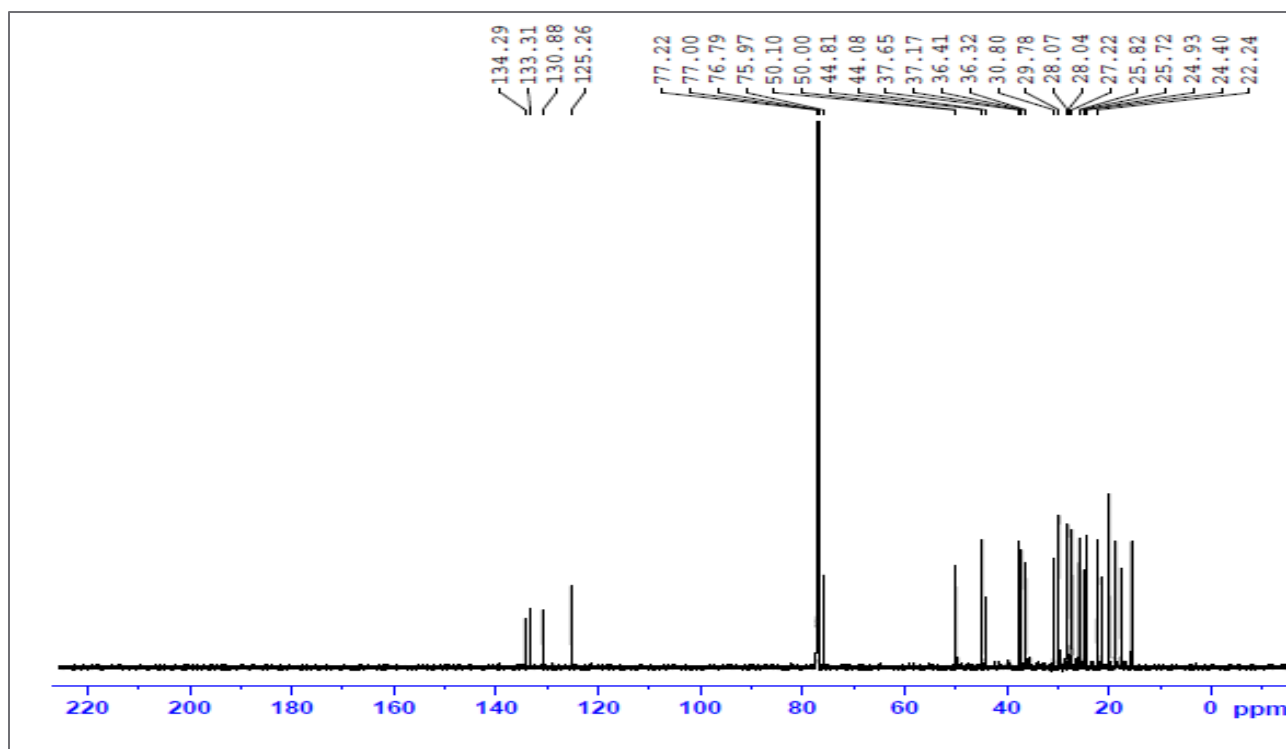

**Figure S5.**  $^{13}\text{C}$ -NMR (150 MHz,  $\text{CDCl}_3$ ) of compound **2**

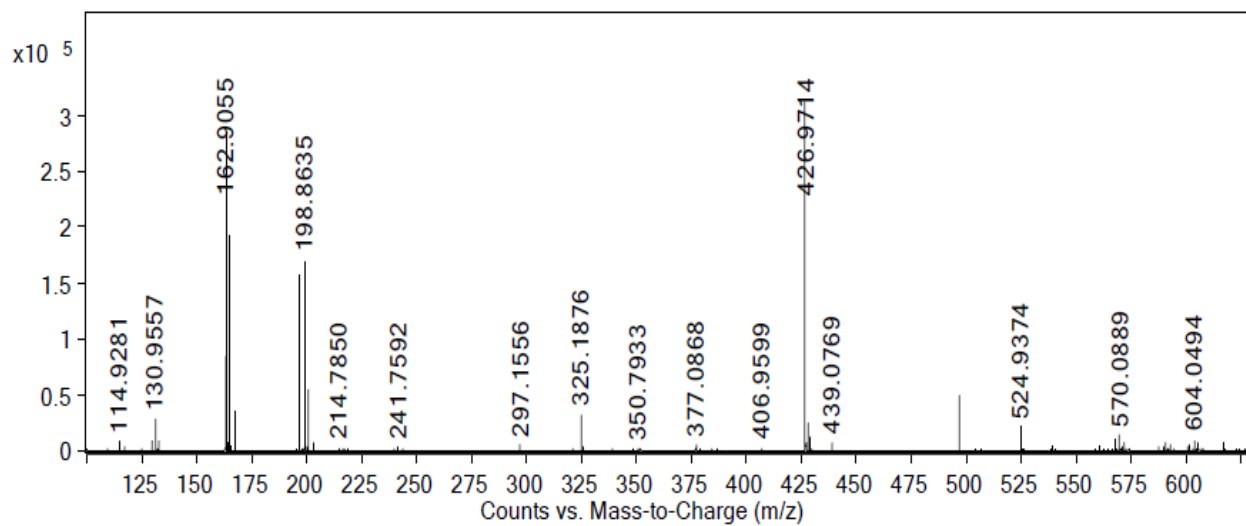

**Figure S6.** HRMS ( $\text{ESI}^+$ ) of compound **2**

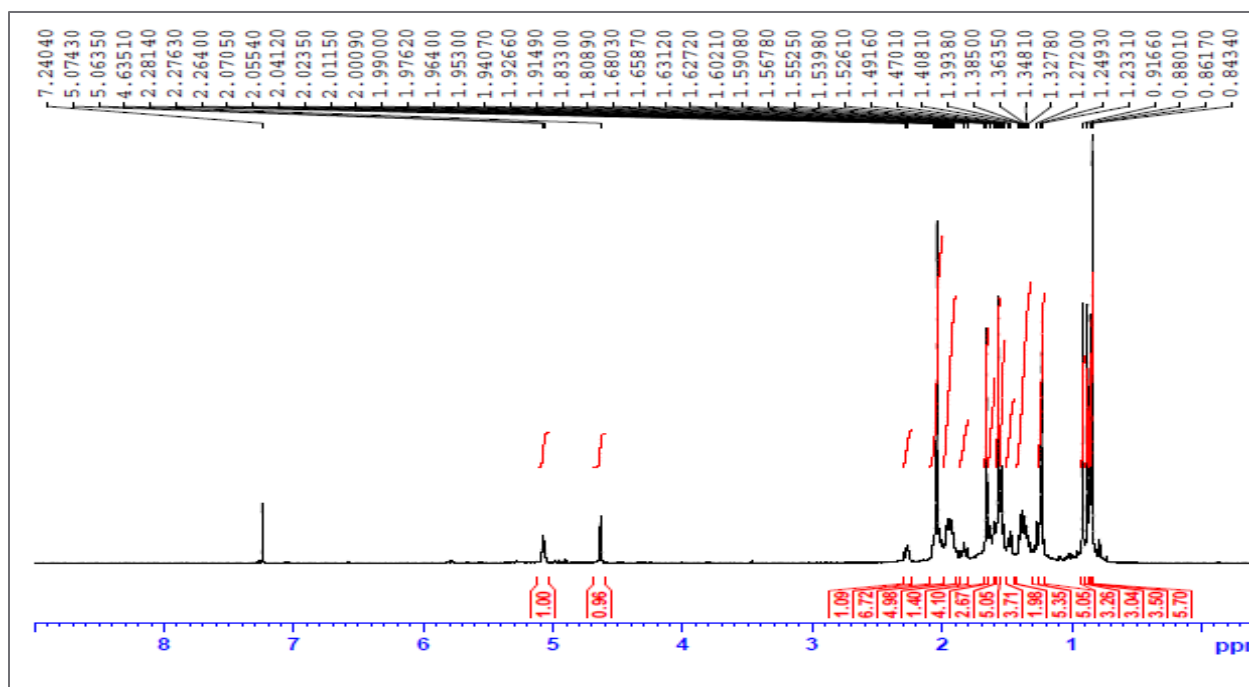

**Figure S7.**  $^1\text{H}$ -NMR ((600 MHz,  $\text{CDCl}_3$ ) of compound **3**

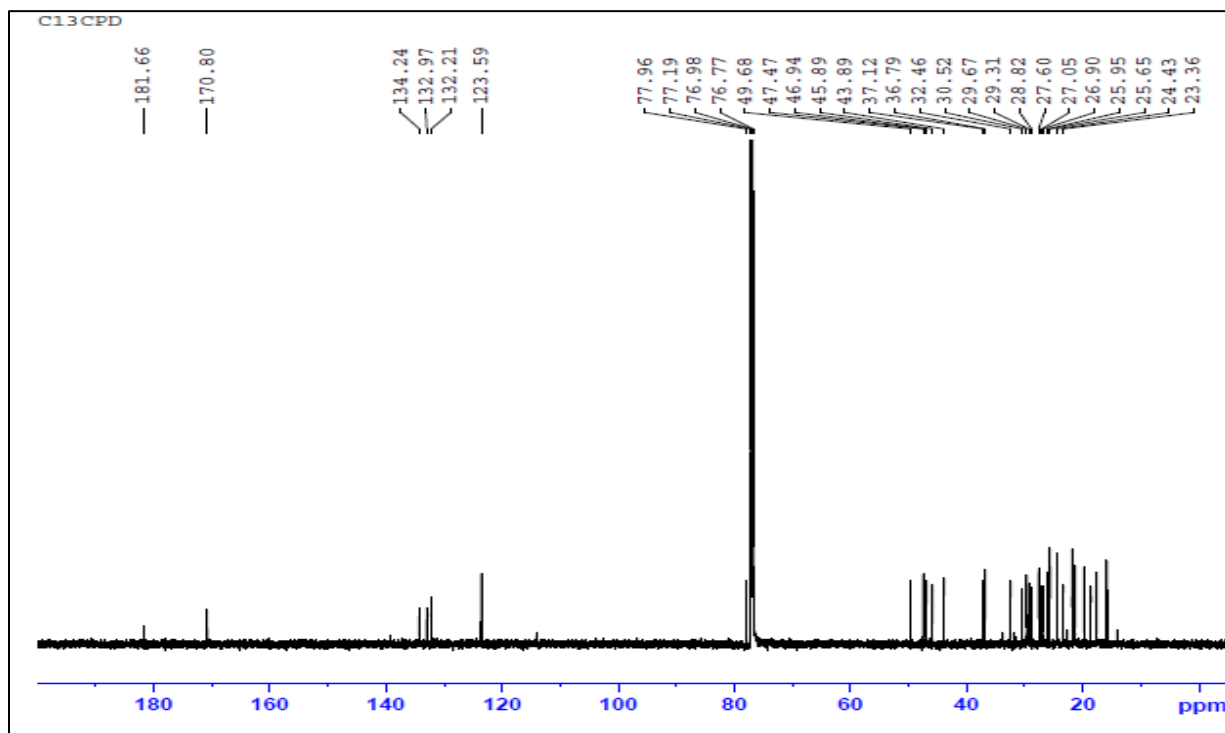

**Figure S8.**  $^{13}\text{C}$ -NMR (150 MHz,  $\text{CDCl}_3$ ) of compound **3**

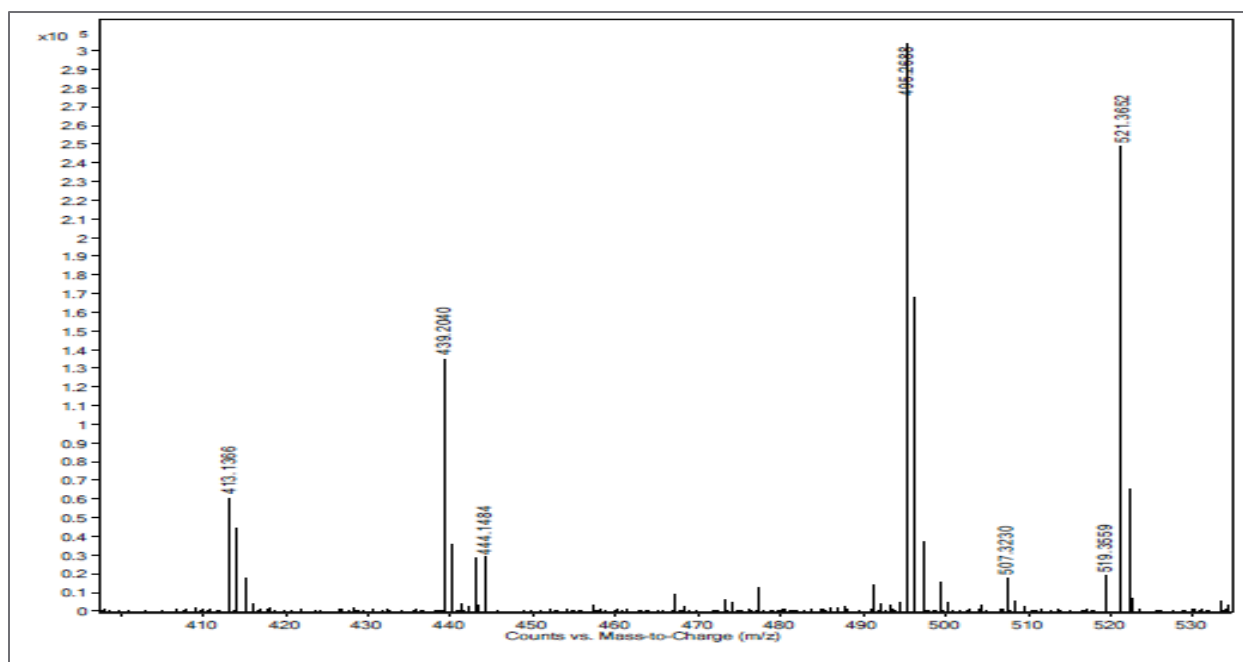

**Figure S9.** HRMS (ESI<sup>+</sup>) of compound **3**

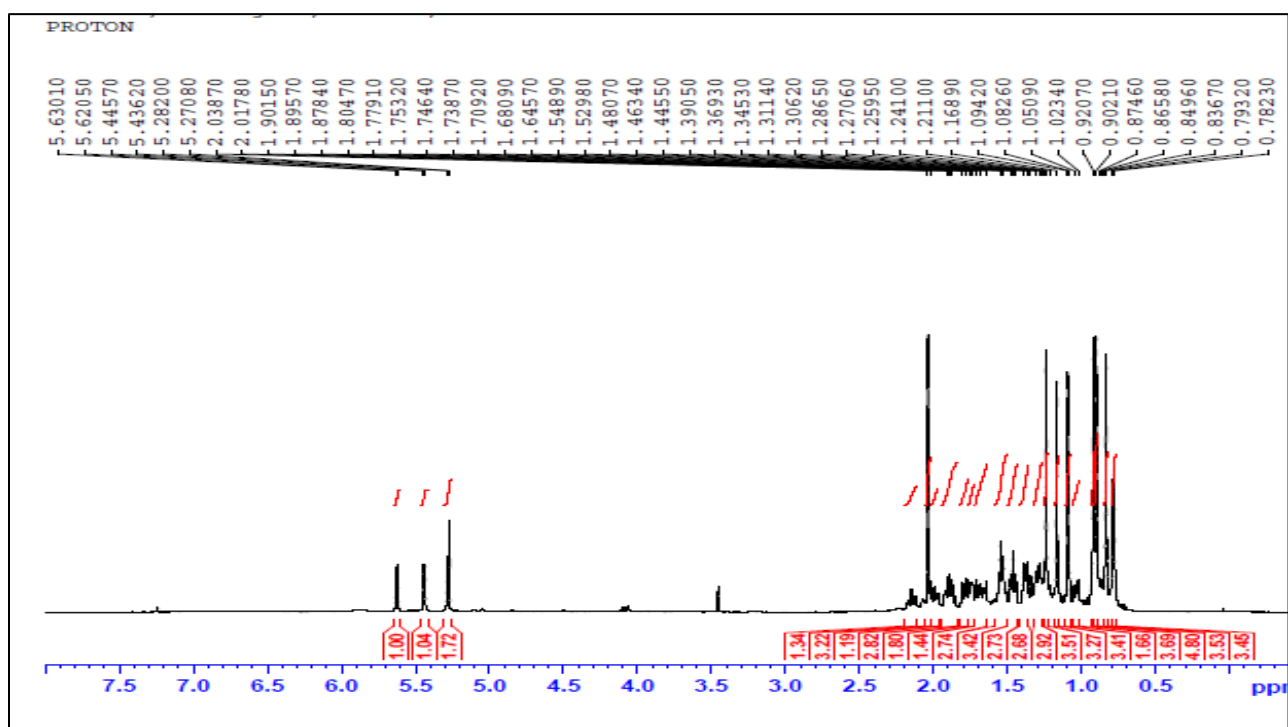

**Figure S10.** <sup>1</sup>H-NMR (600 MHz, CDCl<sub>3</sub>) of compound **4**

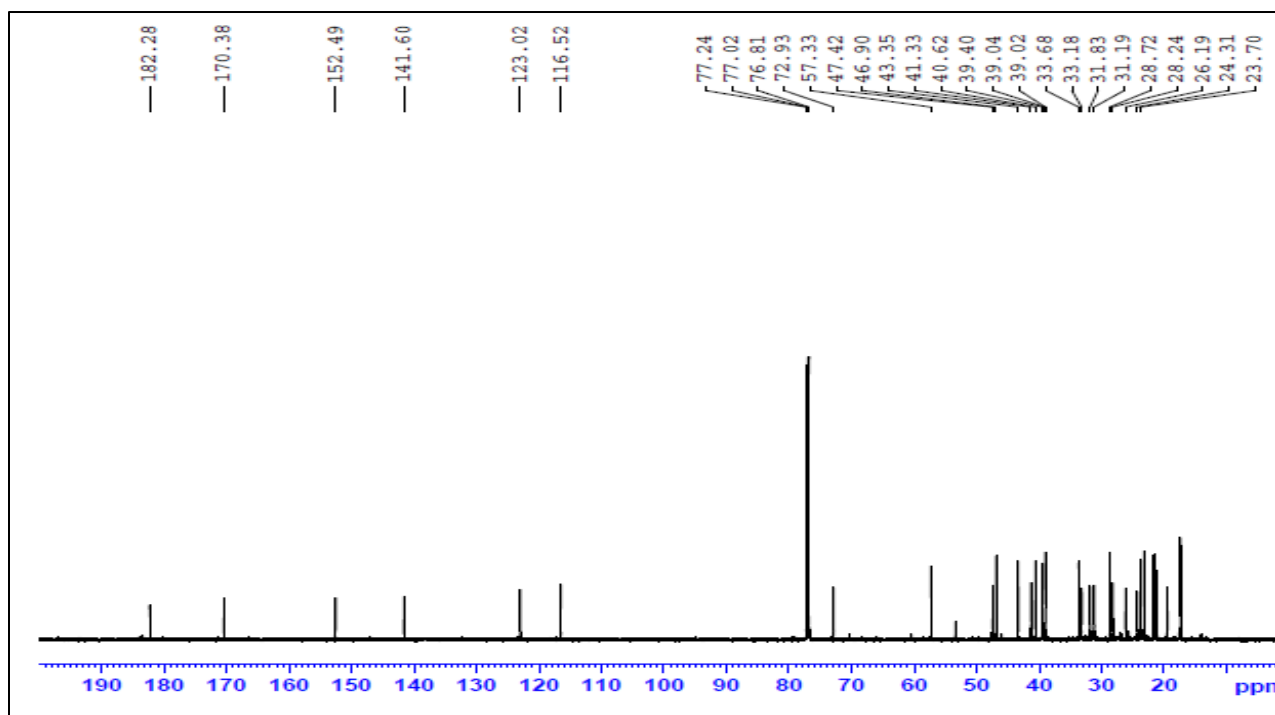

**Figure S11.**  $^{13}\text{C}$ -NMR (150 MHz,  $\text{CDCl}_3$ ) of compound **4**

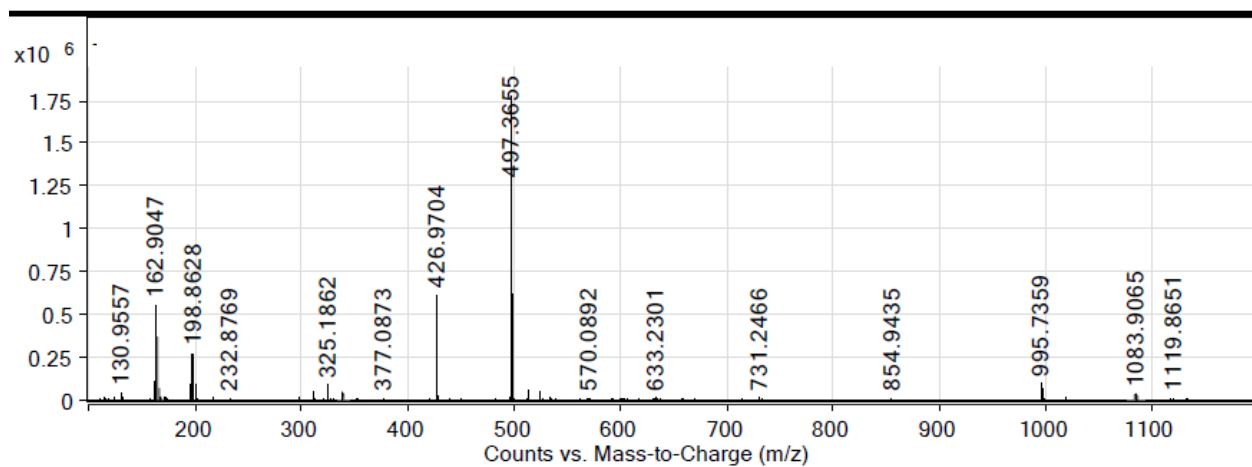

**Figure S12.** HRMS ( $\text{ESI}^+$ ) of compound **4**

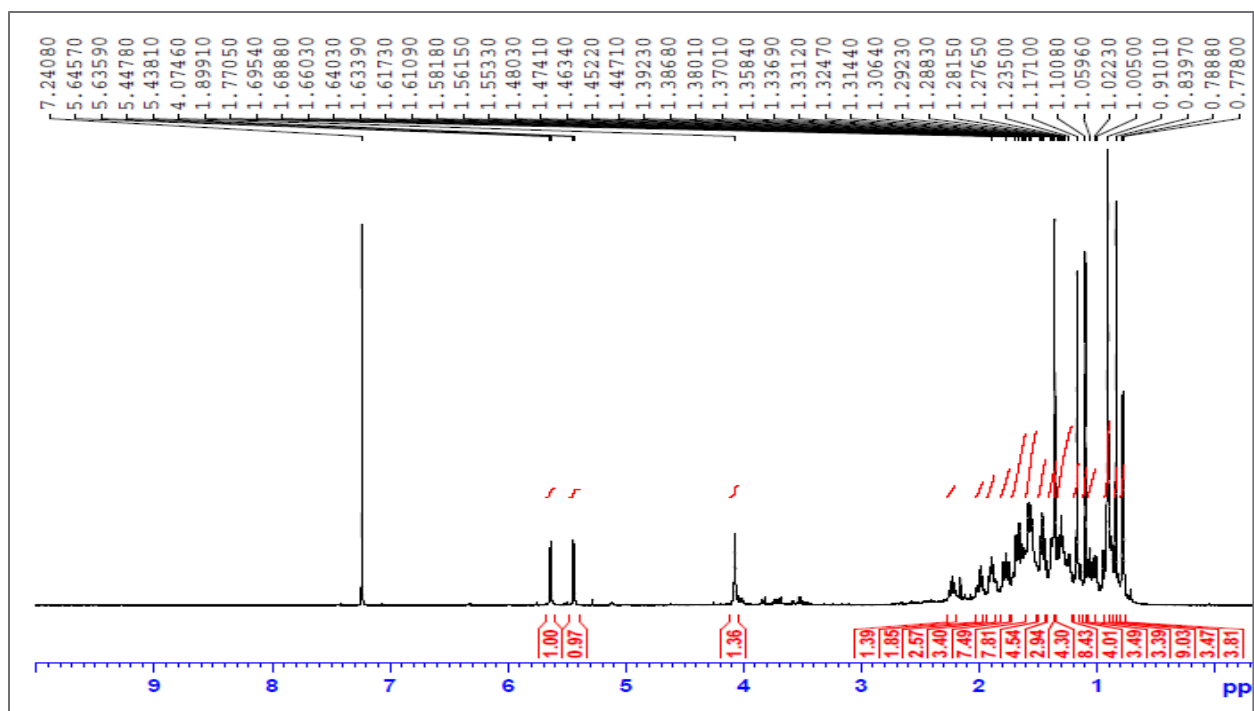

**Figure S13.** <sup>1</sup>H-NMR (600 MHz, CDCl<sub>3</sub>) of compound **5**

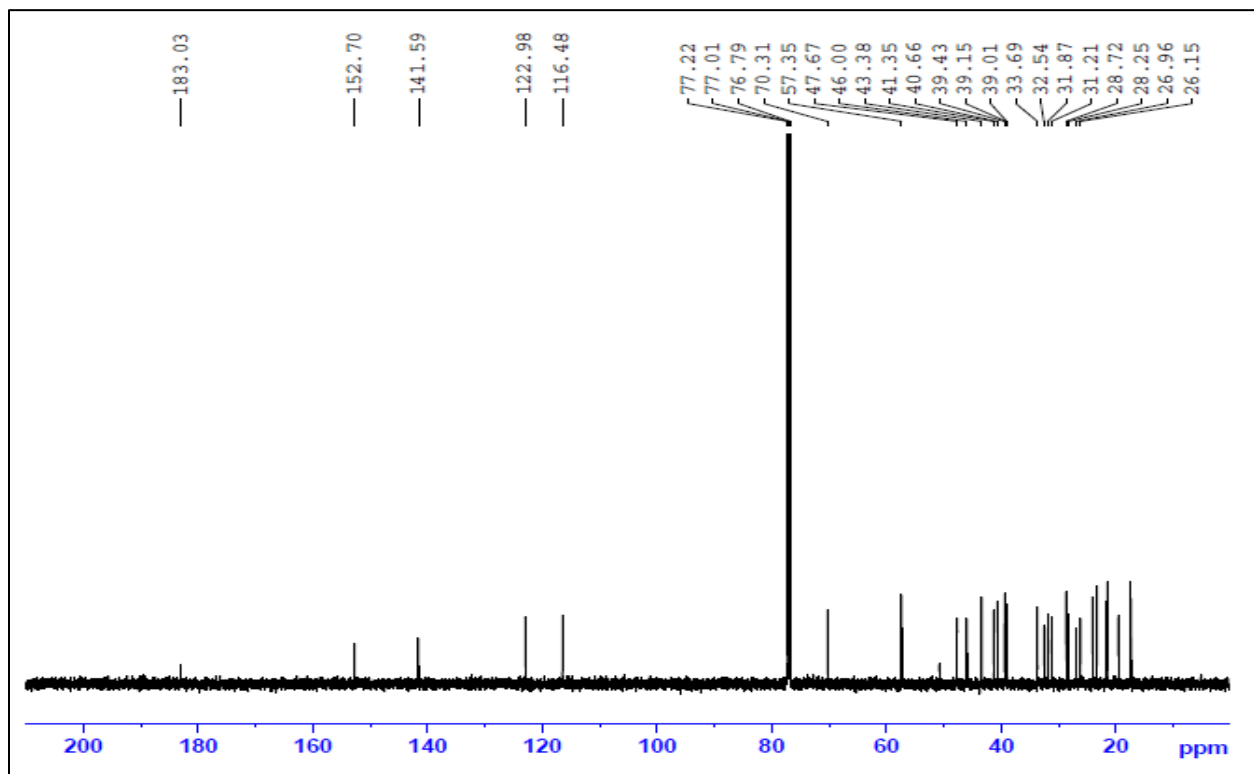

**Figure S14.** <sup>13</sup>C-NMR (150 MHz, CDCl<sub>3</sub>) of compound **5**

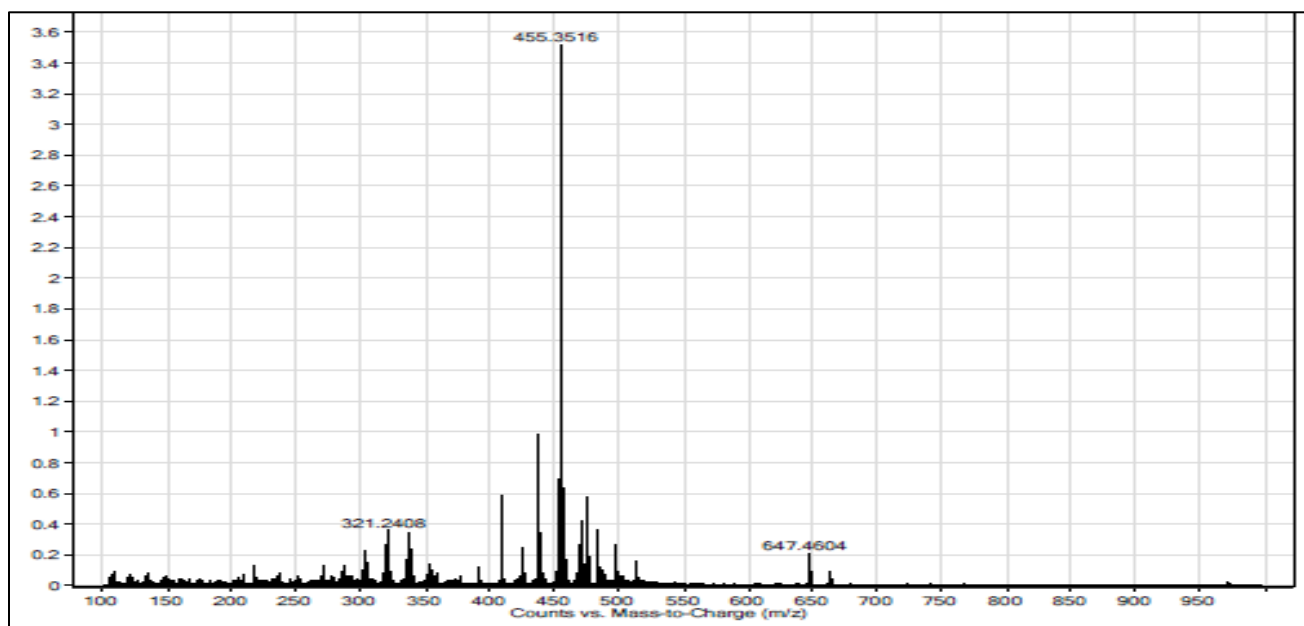

**Figure S15.** HRMS (ESI<sup>+</sup>) of compound **5**

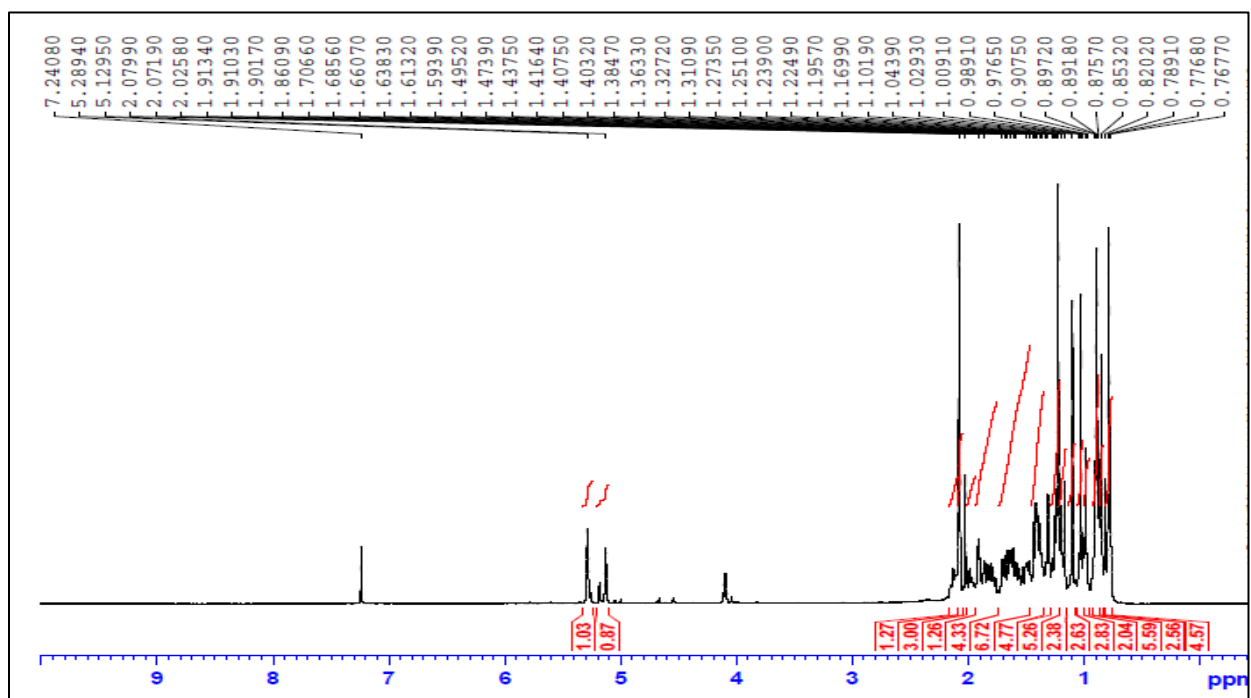

**Figure S16.** <sup>1</sup>H-NMR (600 MHz, CDCl<sub>3</sub>) of compound **6**

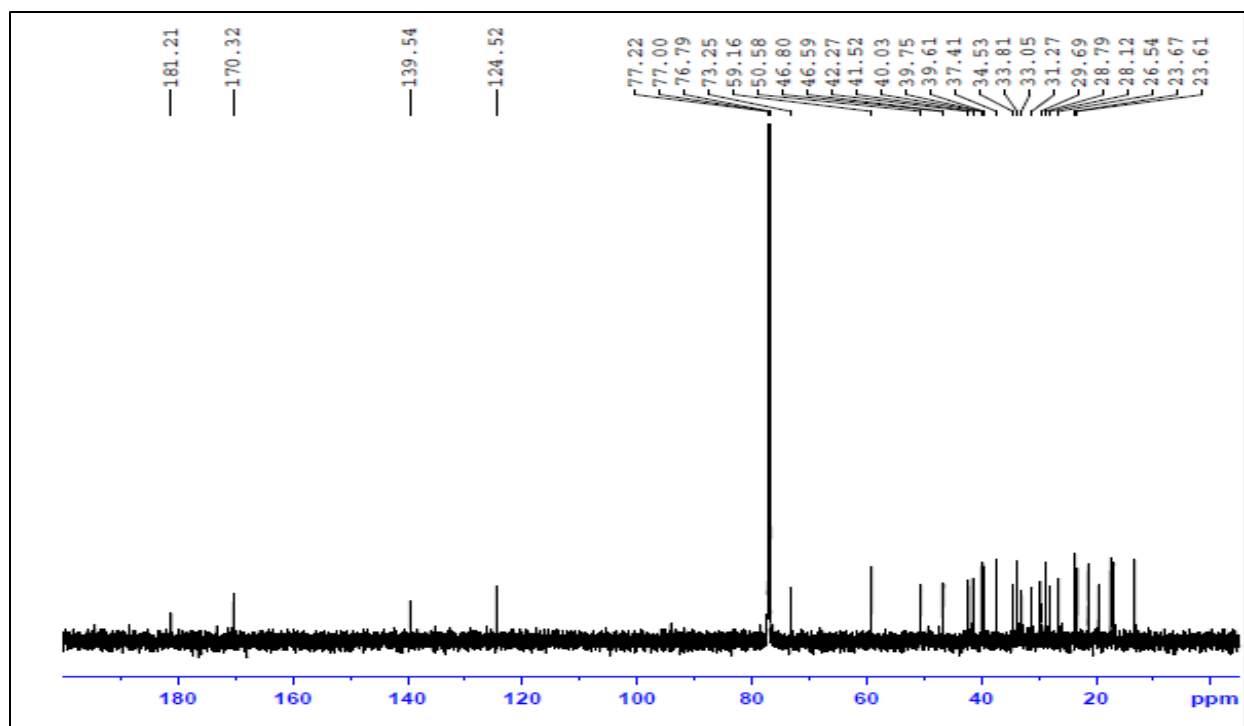

**Figure S17.**  $^{13}\text{C}$ -NMR (150 MHz,  $\text{CDCl}_3$ ) of compound **6**

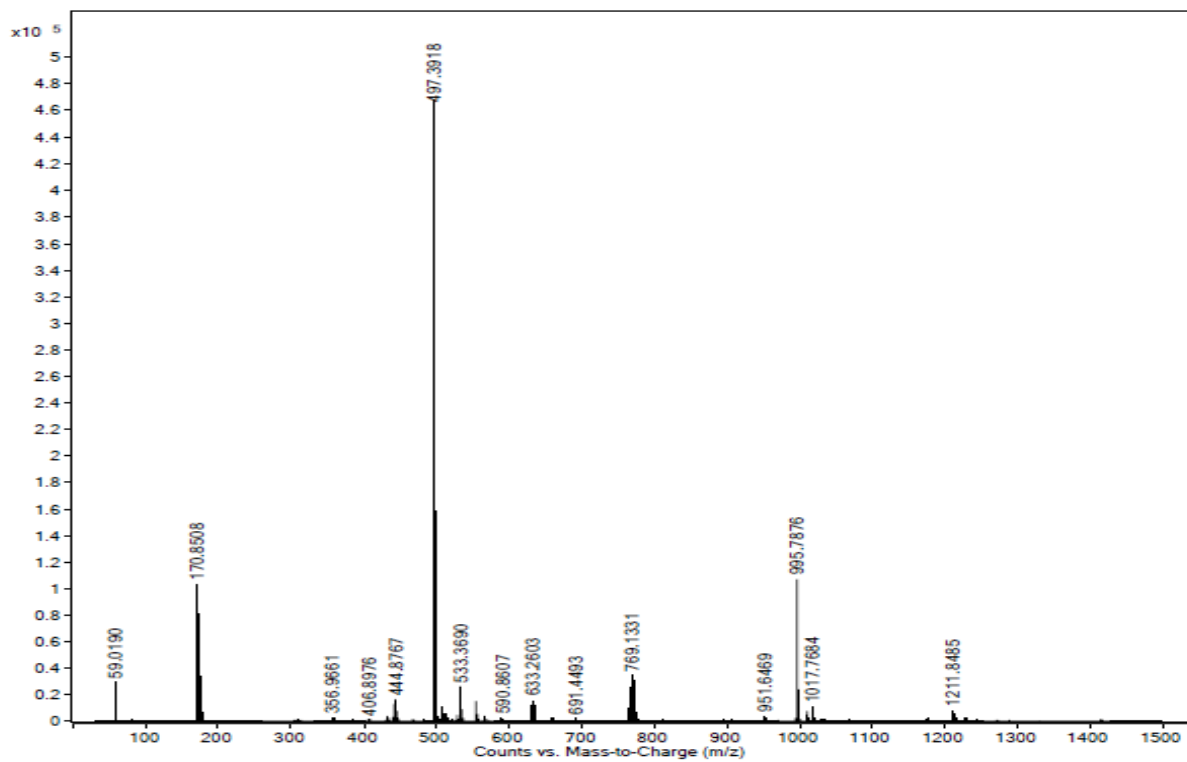

**Figure S18.** HRMS (ESI) of compound **6**

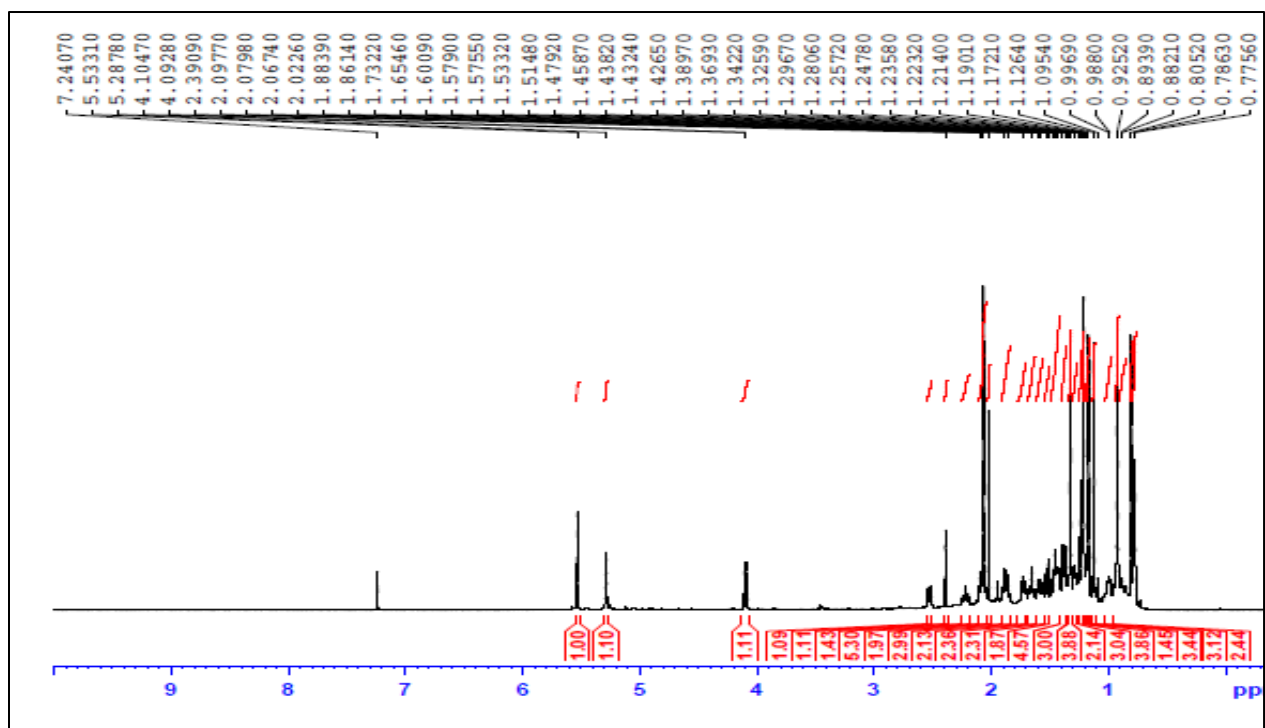

**Figure S19.** <sup>1</sup>H-NMR (600 MHz, CDCl<sub>3</sub>) of compound **7**

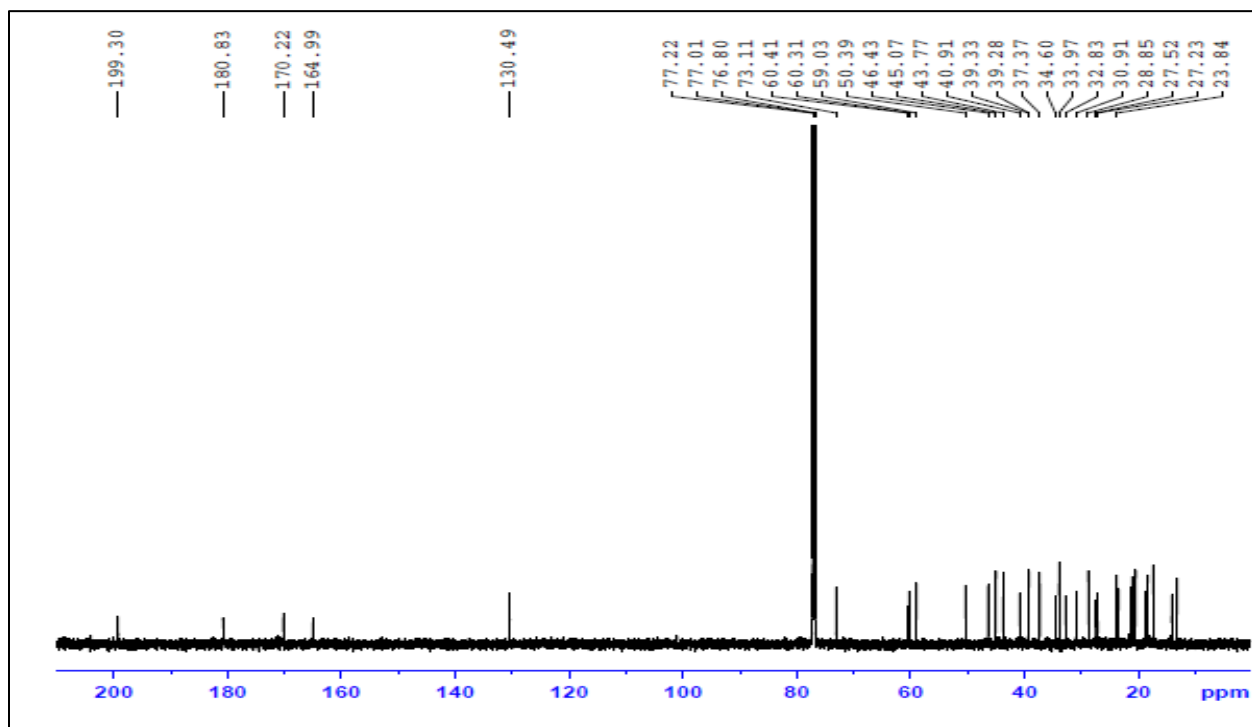

**Figure S20.** <sup>13</sup>C-NMR (150 MHz, CDCl<sub>3</sub>) of compound **7**

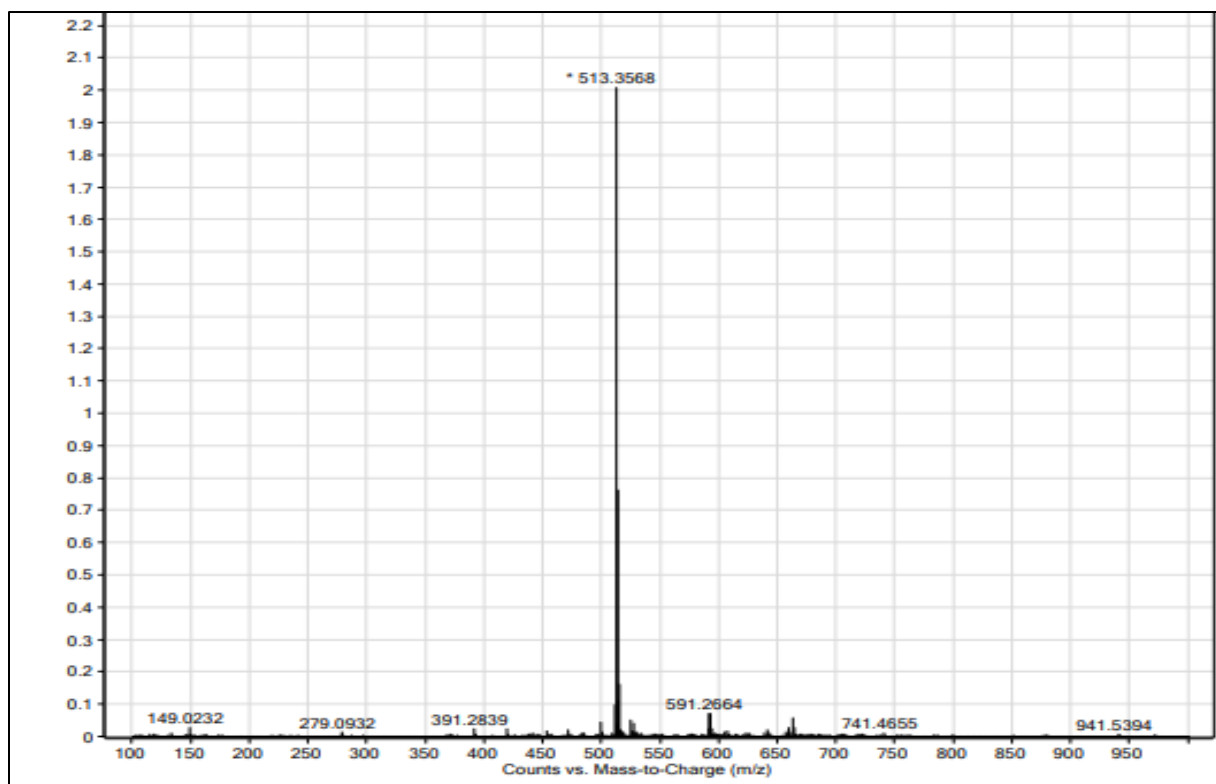

**Figure S21.** HRMS (ESI<sup>+</sup>) of compound 7

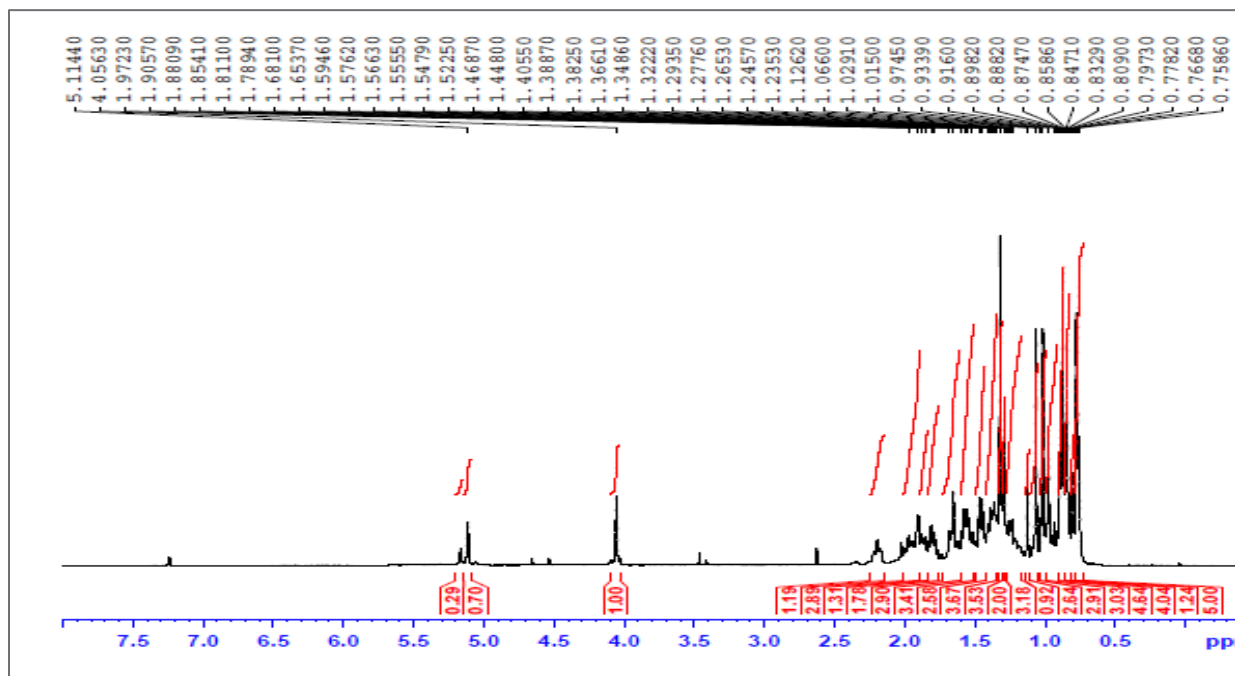

**Figure S22.** <sup>1</sup>H-NMR (600 MHz, CDCl<sub>3</sub>) of compound 8

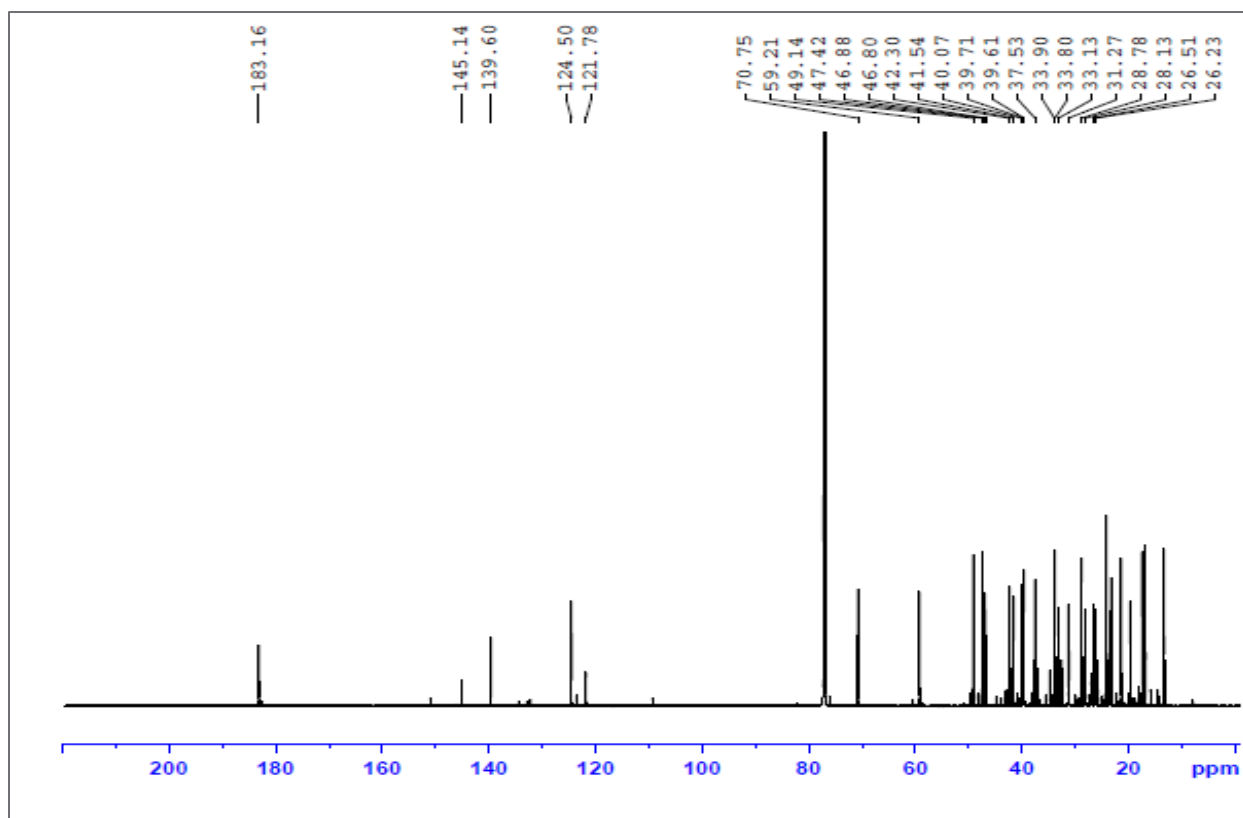

**Figure S23.** <sup>13</sup>C-NMR ((150 MHz, CDCl<sub>3</sub>) of compound **8**

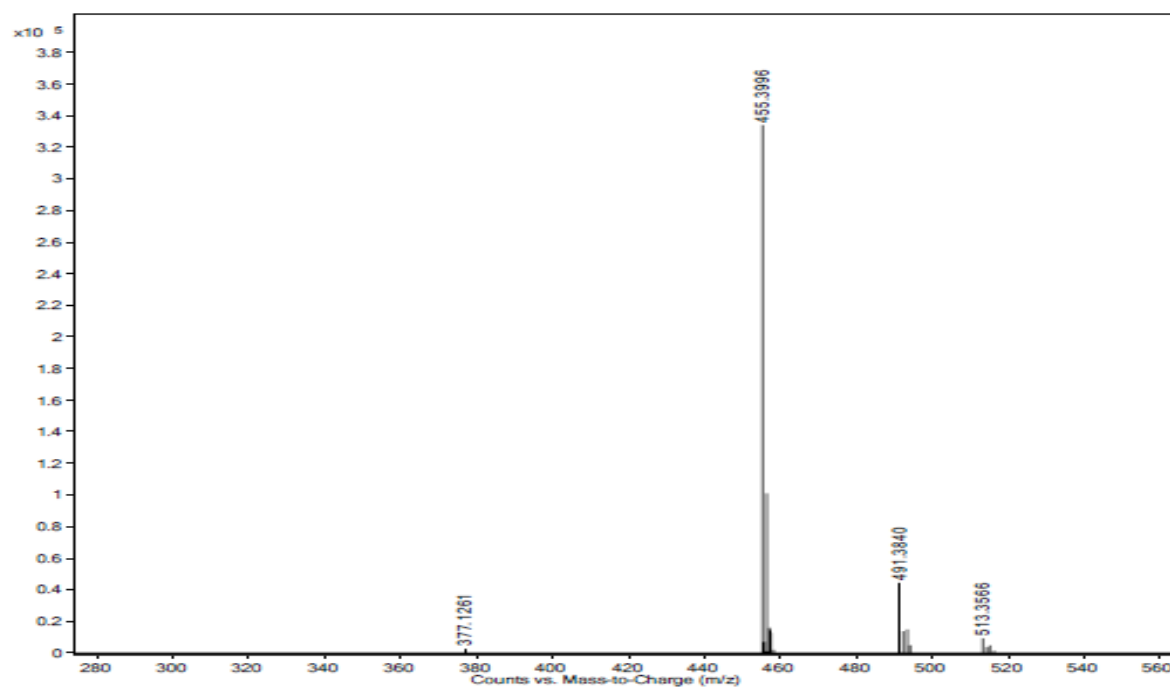

**Figure S24.** HRMS (ESI) of compound **8**

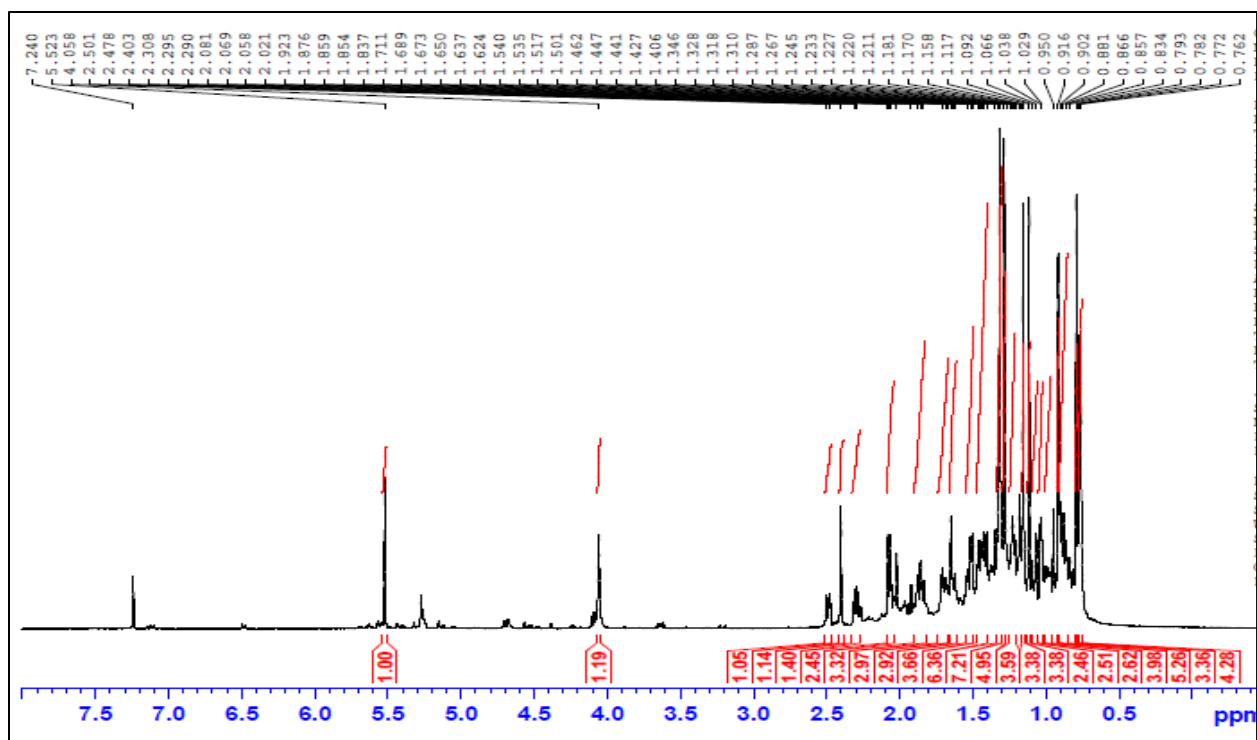

**Figure S25.**  $^1\text{H}$ -NMR (600 MHz,  $\text{CDCl}_3$ ) of compound **9**

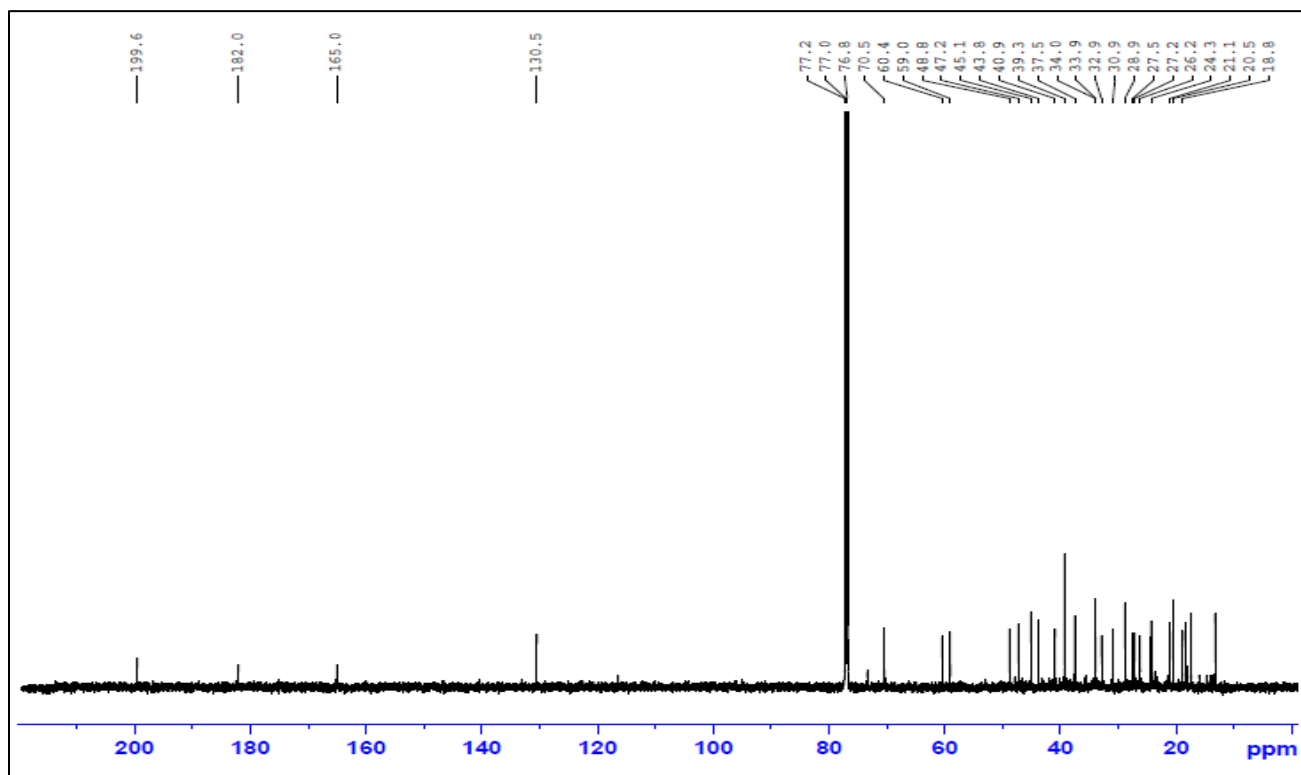

**Figure S26.**  $^{13}\text{C}$ -NMR (150 MHz,  $\text{CDCl}_3$ ) of compound **9**

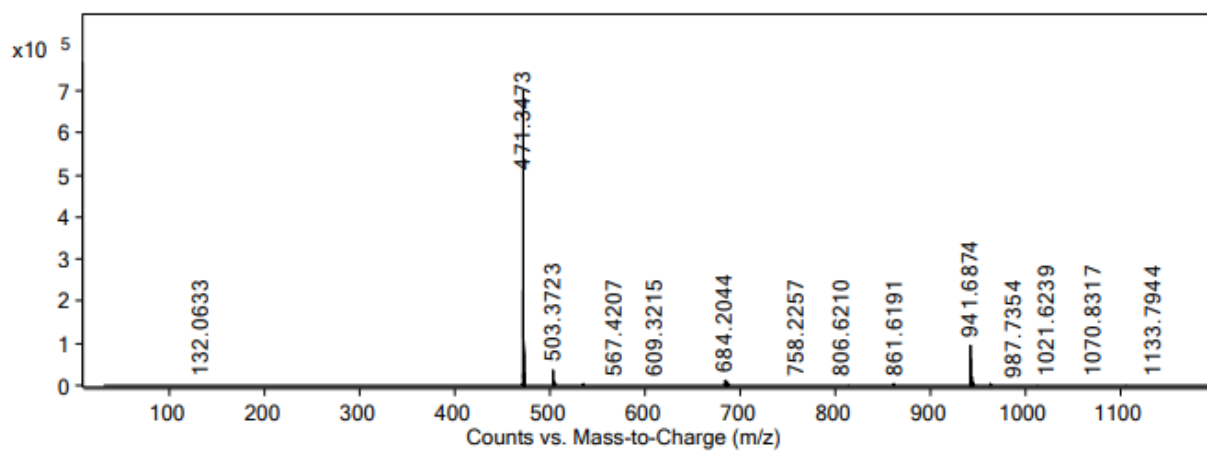

**Figure S27.** ESI-MS (positive) of compound **9**

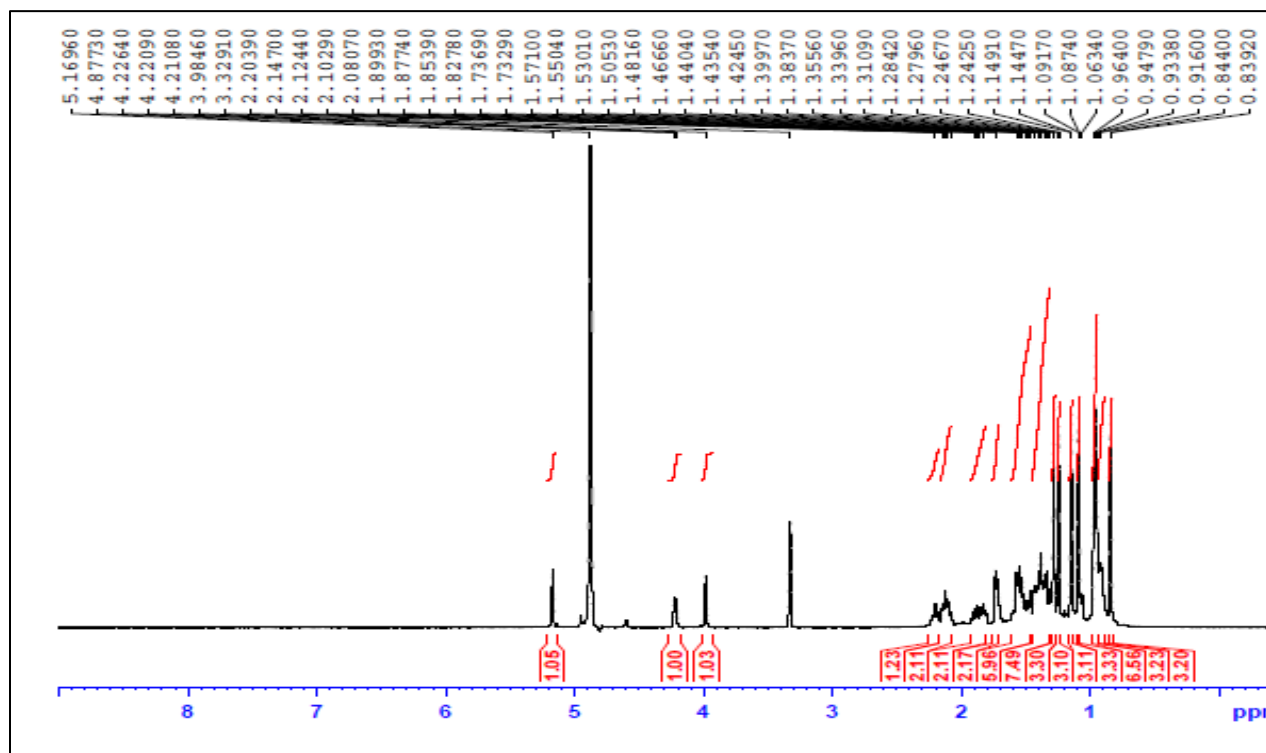

**Figure S28.** <sup>1</sup>H-NMR (600 MHz, CDCl<sub>3</sub>) of compound **10**

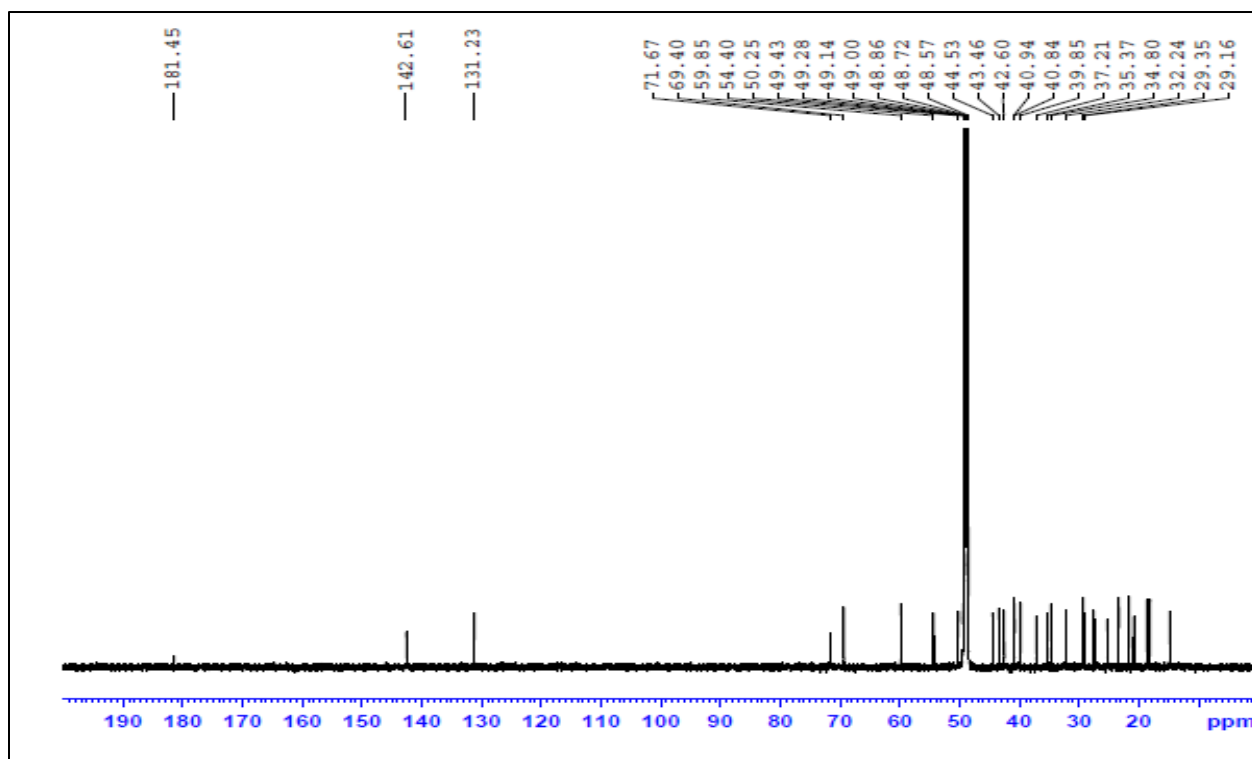

**Figure S29.** <sup>13</sup>C-NMR (150 MHz, CDCl<sub>3</sub>) of compound **10**

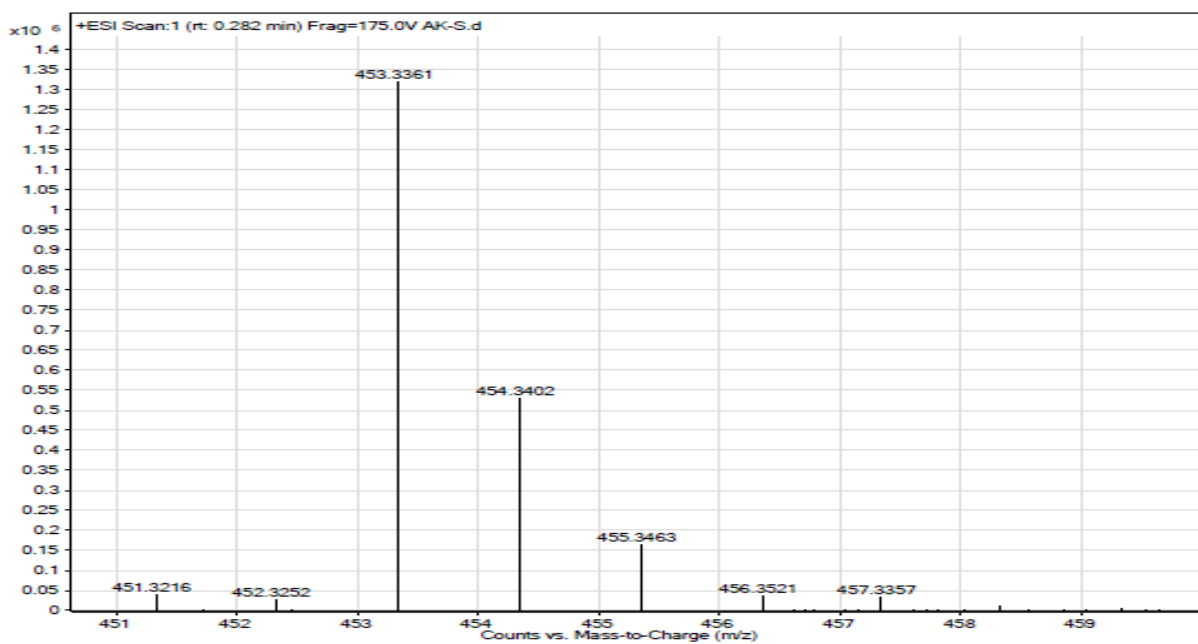

**Figure S30.** HRMS (ESI<sup>+</sup>) of compound **10**

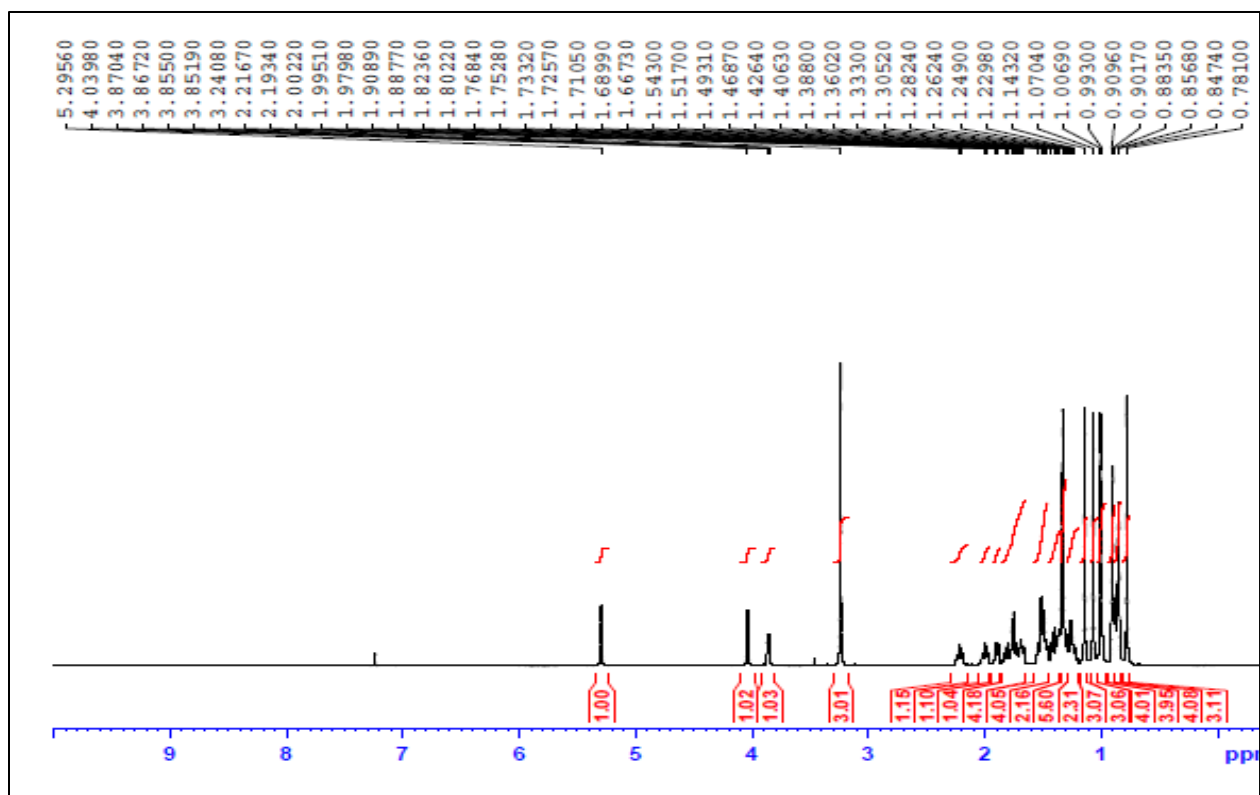

**Figure S31.** <sup>1</sup>H-NMR (600 MHz, CDCl<sub>3</sub>) of compound **11**

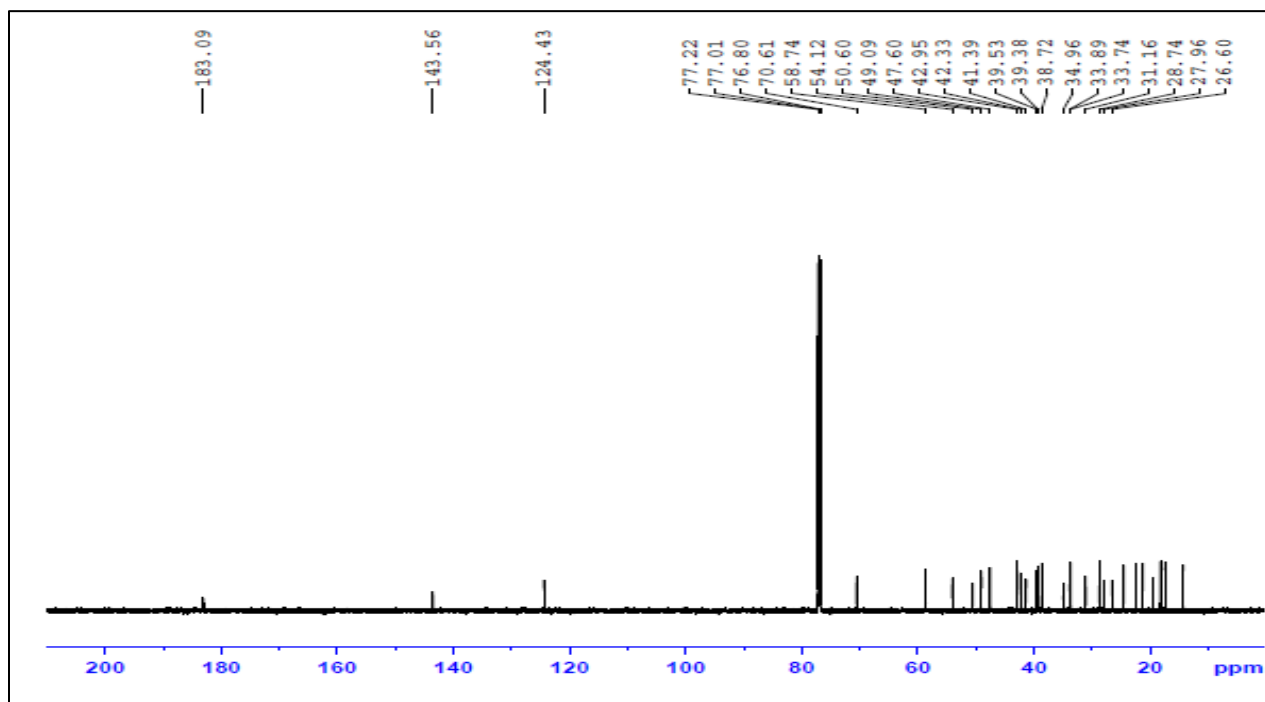

**Figure S32.** <sup>13</sup>C-NMR (150 MHz, CDCl<sub>3</sub>) of compound **11**

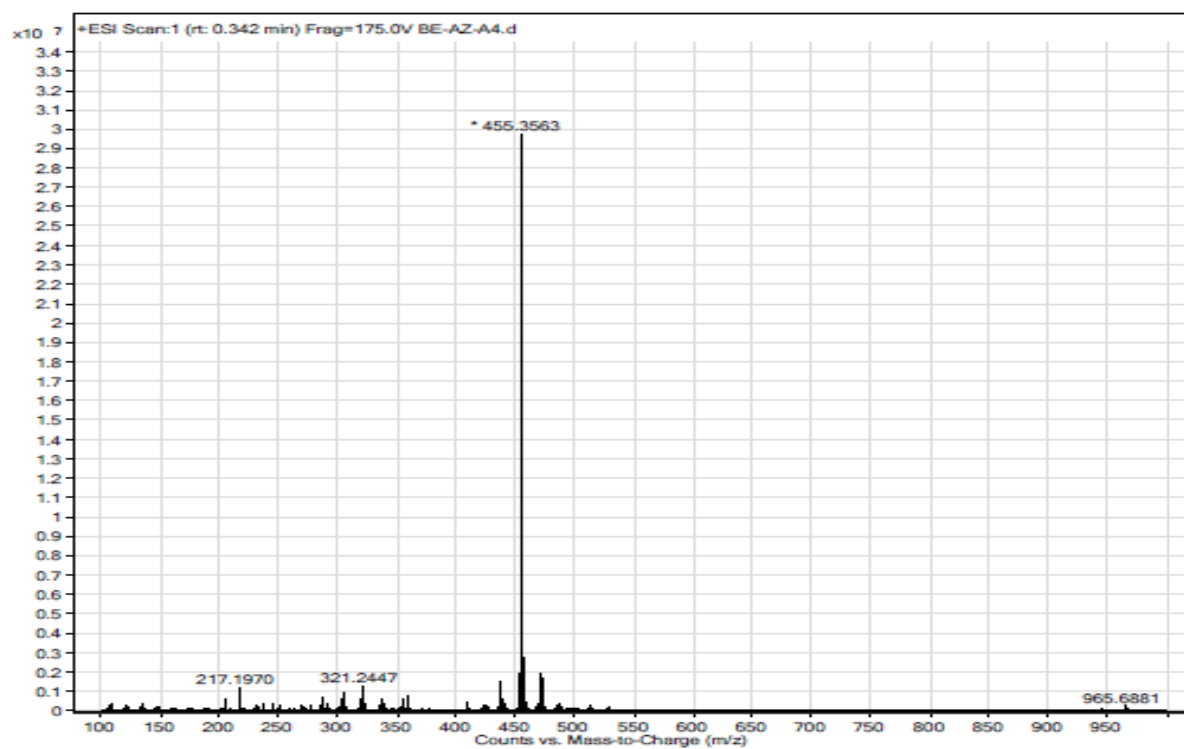

Figure S33. HRMS (ESI<sup>+</sup>) of compound 11

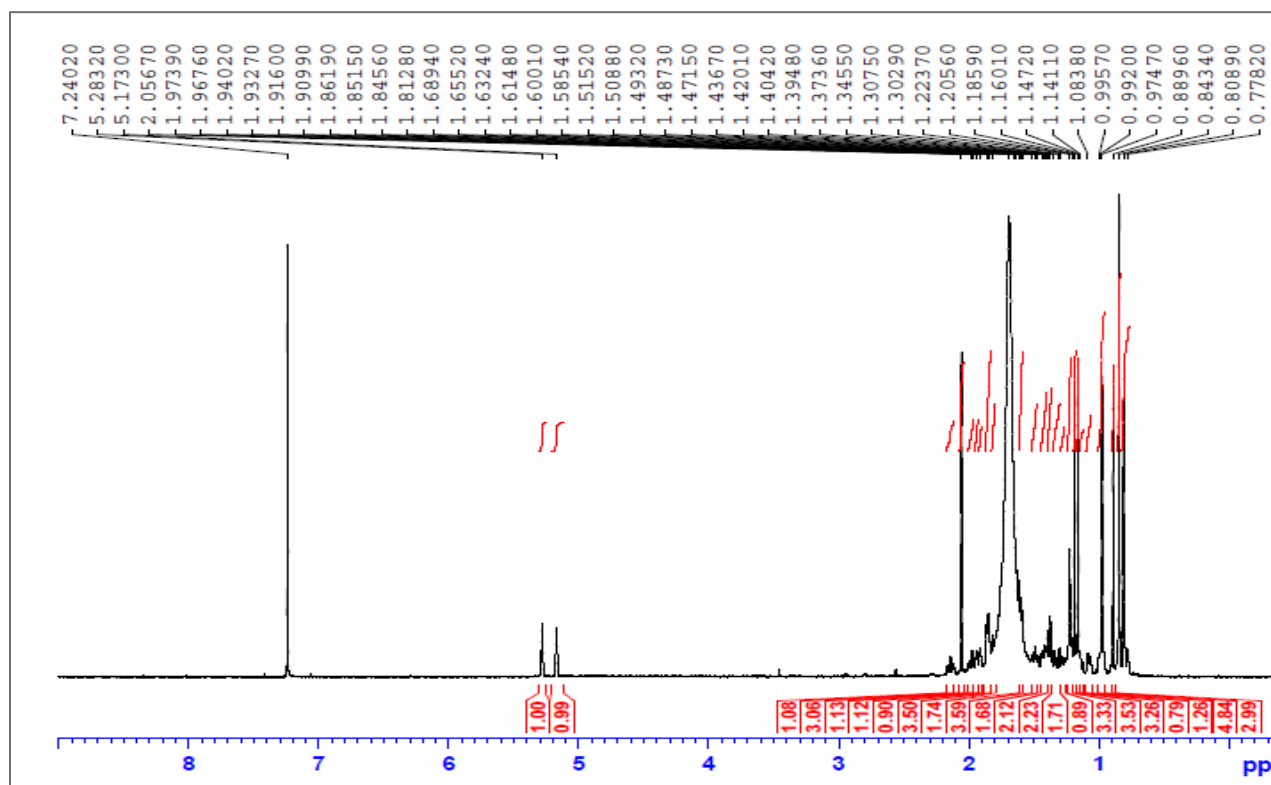

Figure S34. <sup>1</sup>H-NMR (600 MHz, CDCl<sub>3</sub>) of compound 12

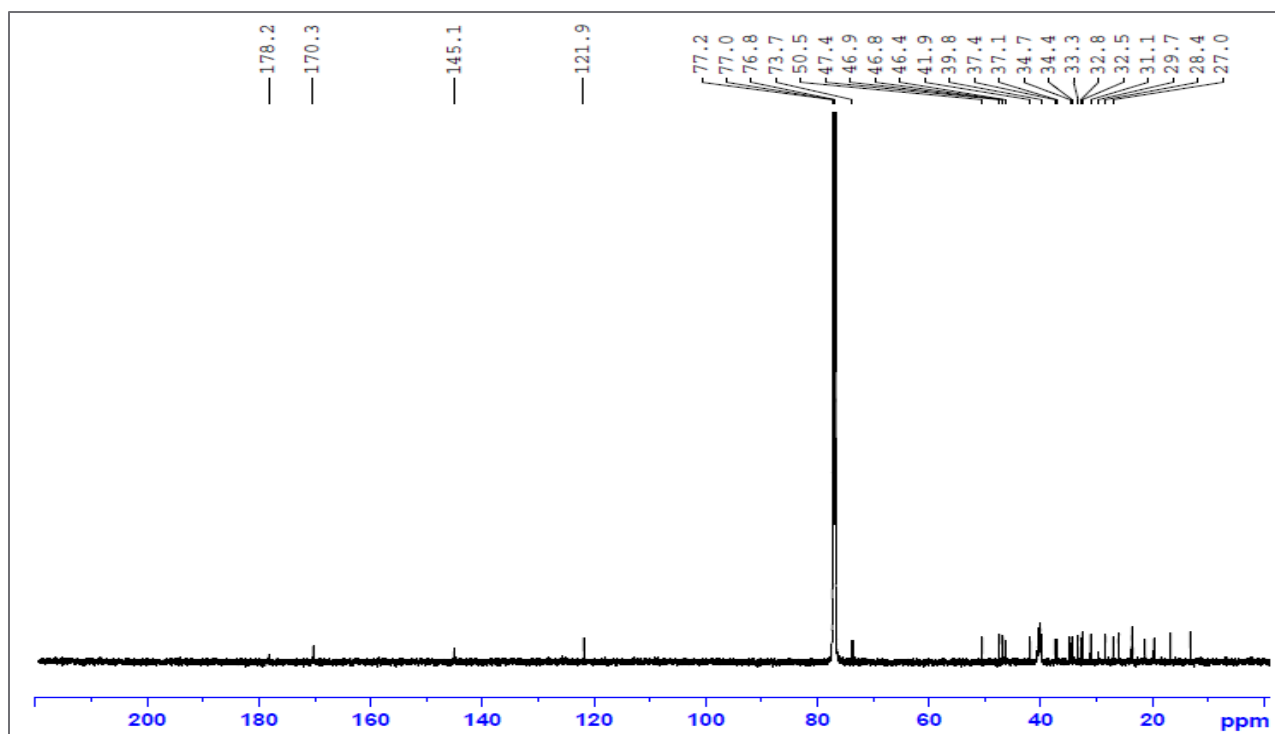

**Figure S35.** <sup>13</sup>C-NMR (150 MHz, CDCl<sub>3</sub>) of compound **12**

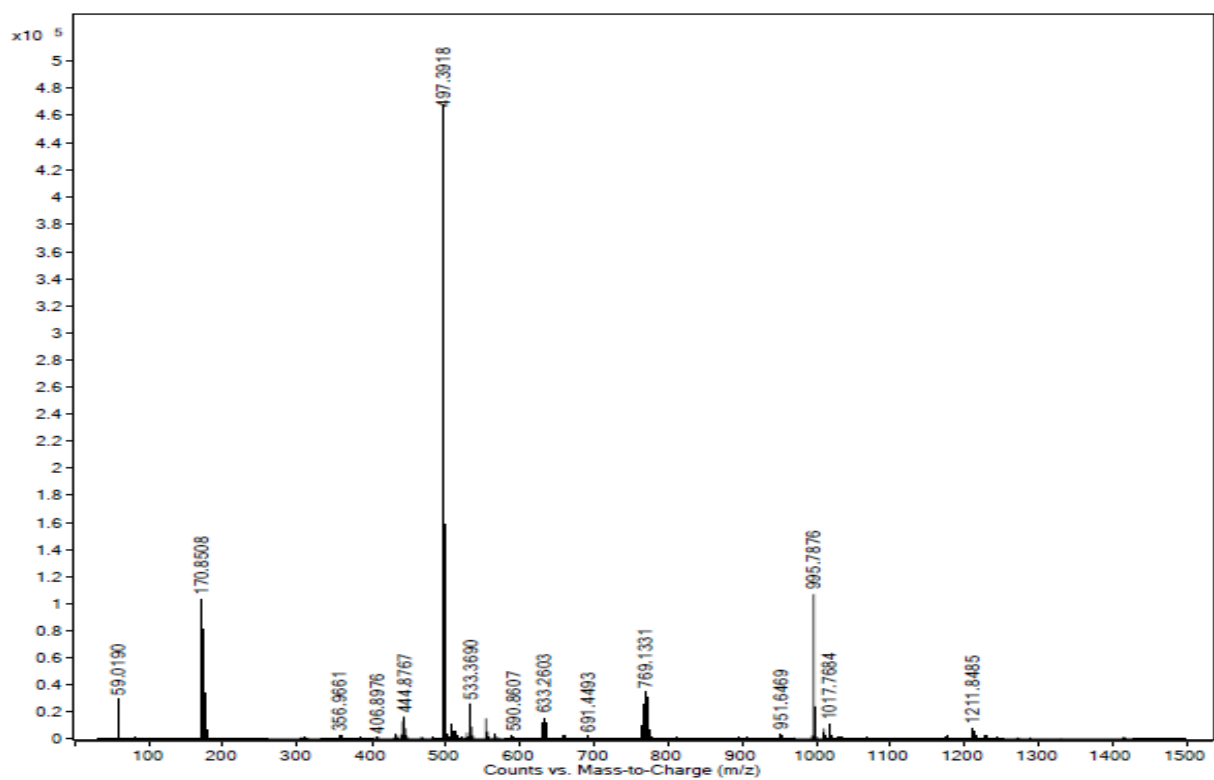

**Figure S36.** HRMS (ESI) of compound **12**

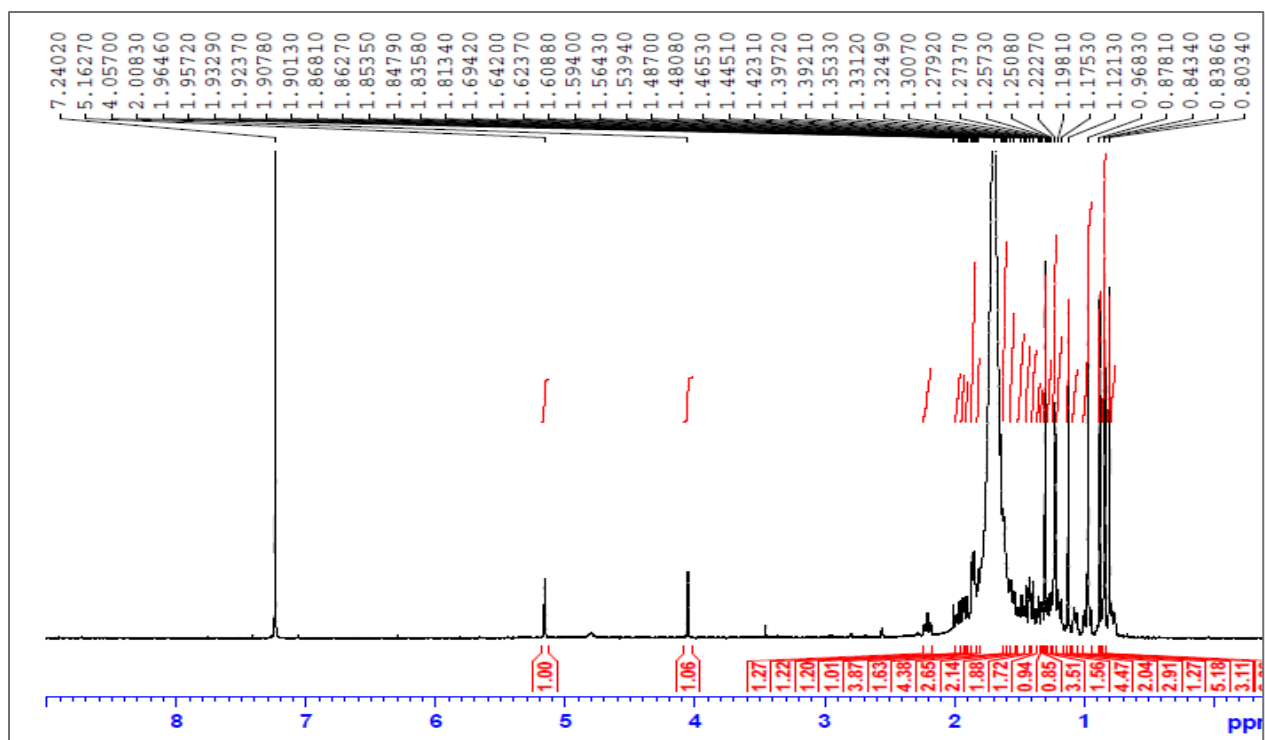

**Figure S37.** <sup>1</sup>H-NMR (600 MHz, CDCl<sub>3</sub>) of compound **13**

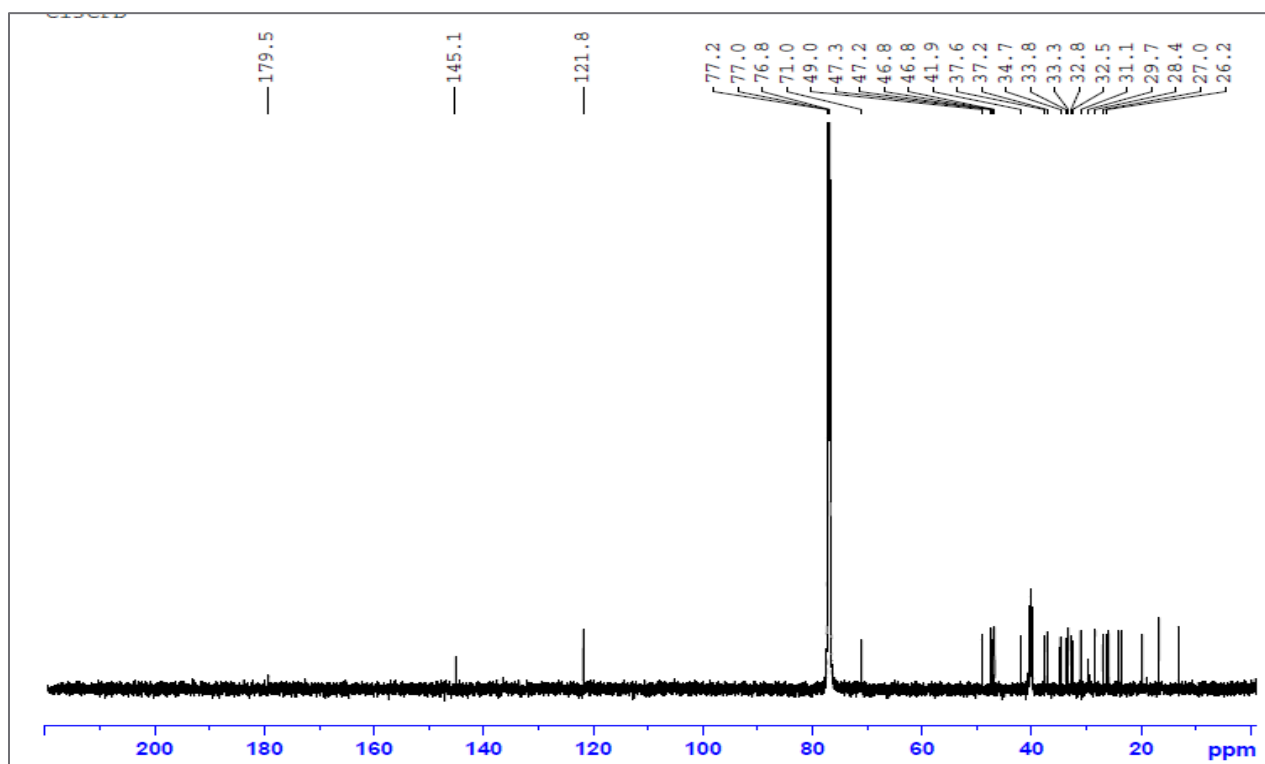

**Figure S38.** <sup>13</sup>C-NMR (150 MHz, CDCl<sub>3</sub>) of compound **13**

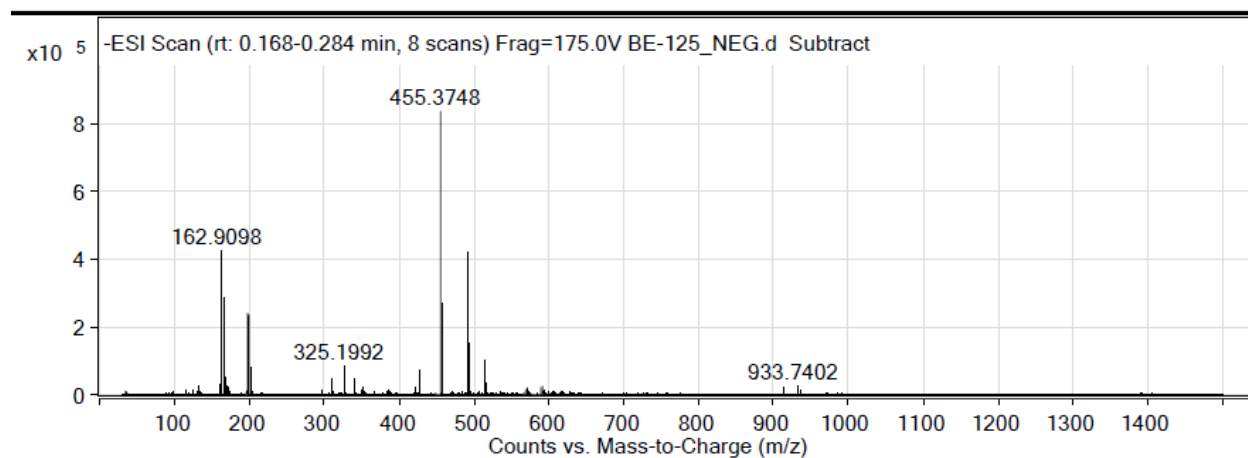

**Figure S39.** HRMS (ESI) of compound **13**

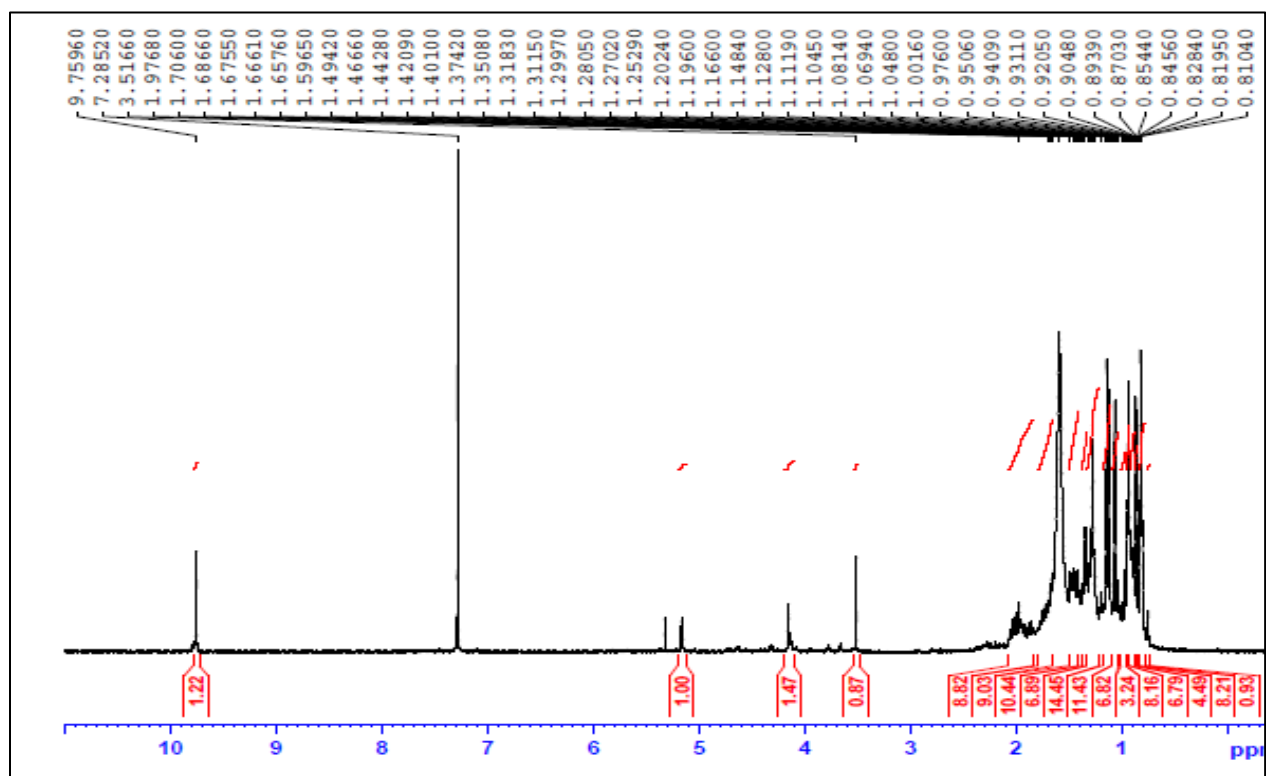

**Figure S40.** <sup>1</sup>H-NMR (600 MHz, CDCl<sub>3</sub>) of compound **14**

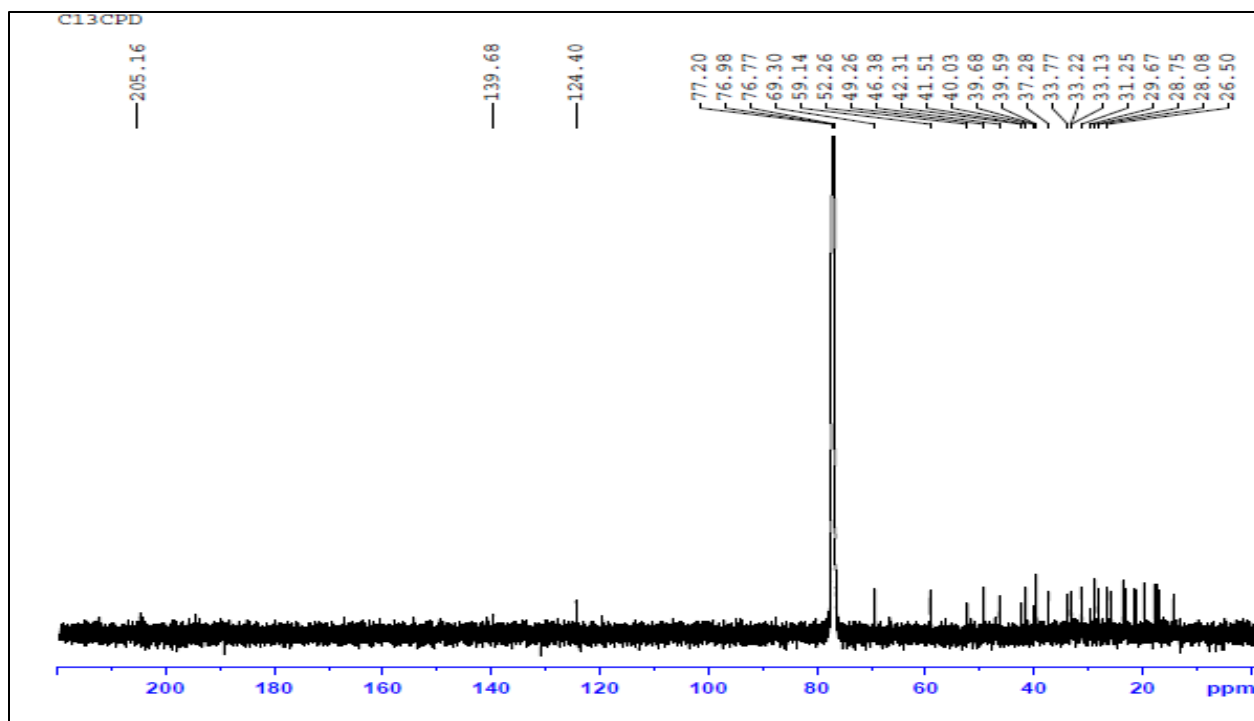

**Figure S41.** <sup>13</sup>C-NMR (150 MHz, CDCl<sub>3</sub>) of compound **14**

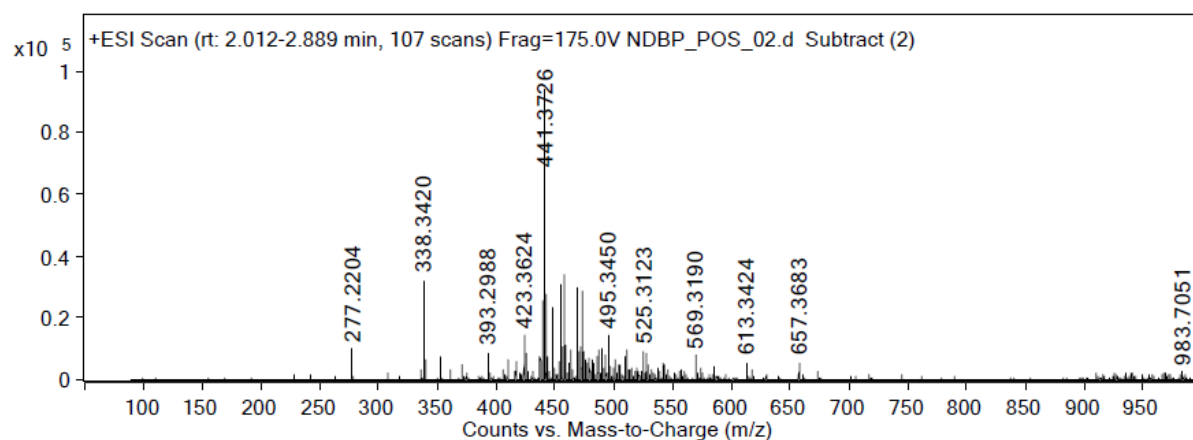

**Figure S42.** HRMS (ESI<sup>+</sup>) of compound **14**

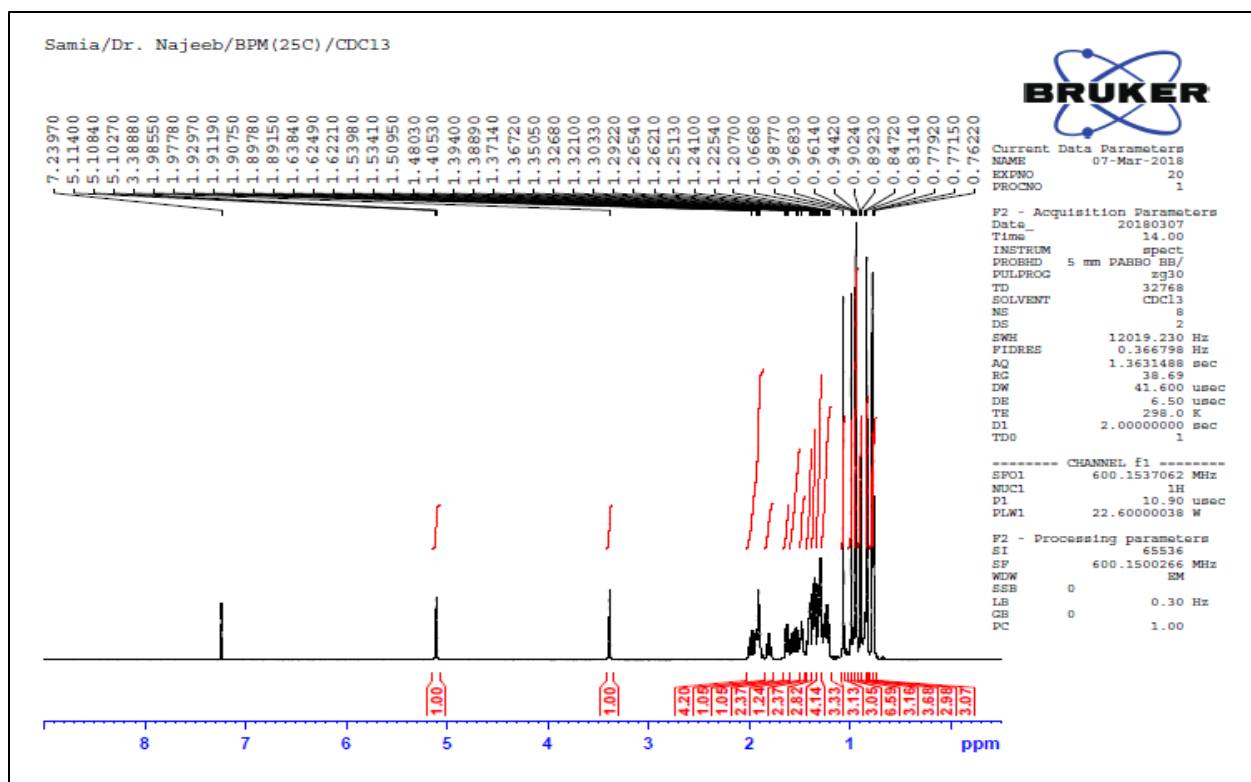

Figure S43. <sup>1</sup>H-NMR (600 MHz, CDCl<sub>3</sub>) of compound **15**

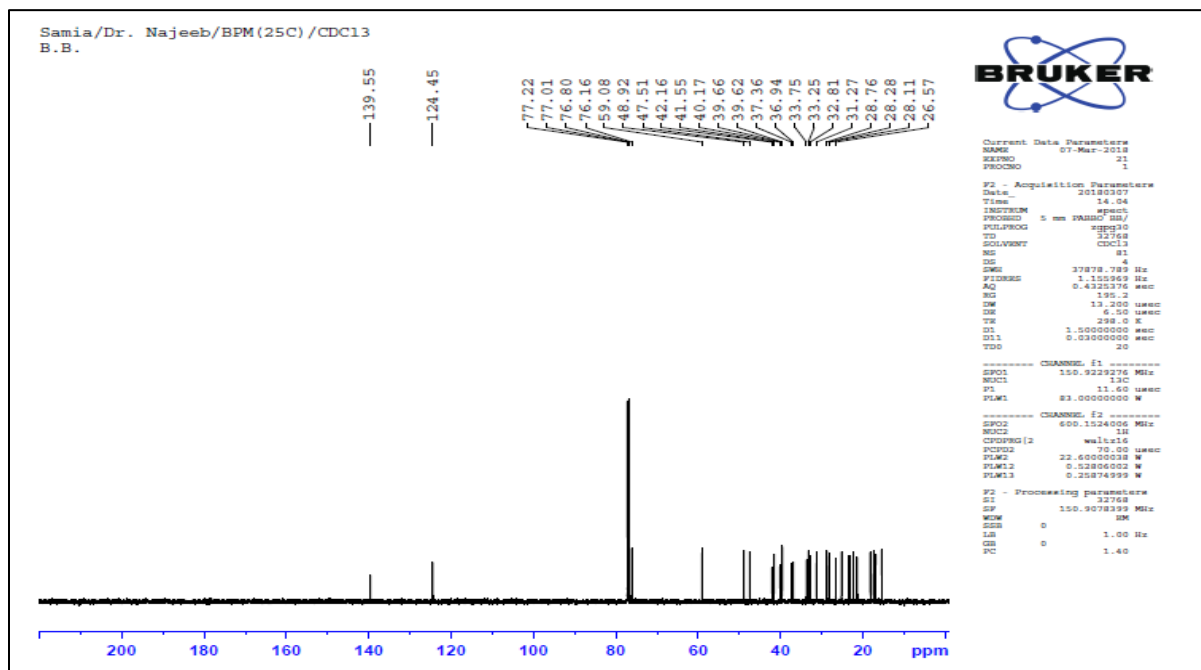

Figure S44. <sup>13</sup>C-NMR (150 MHz, CDCl<sub>3</sub>) of compound **15**

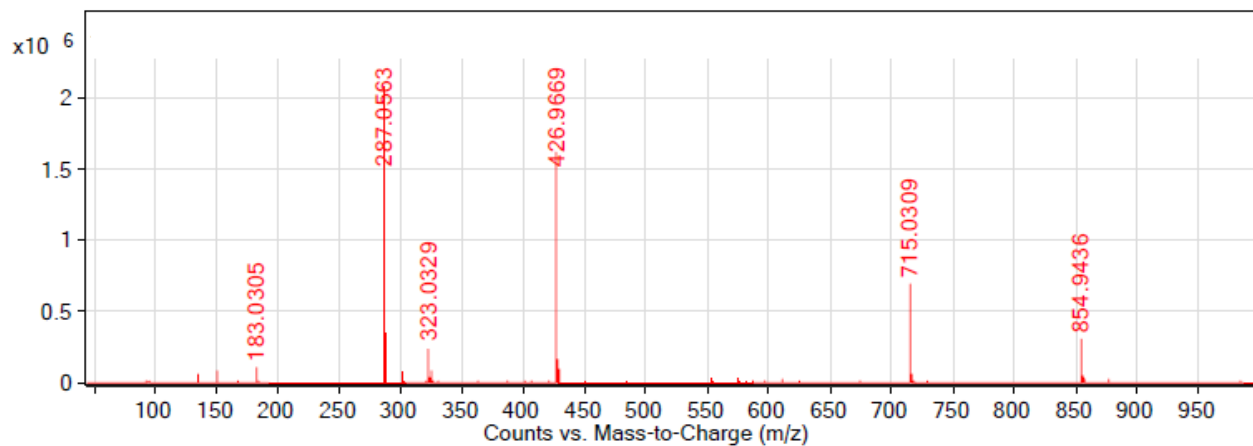

**Figure S45.** HRMS ((ESI<sup>+</sup>)) of compound **15**

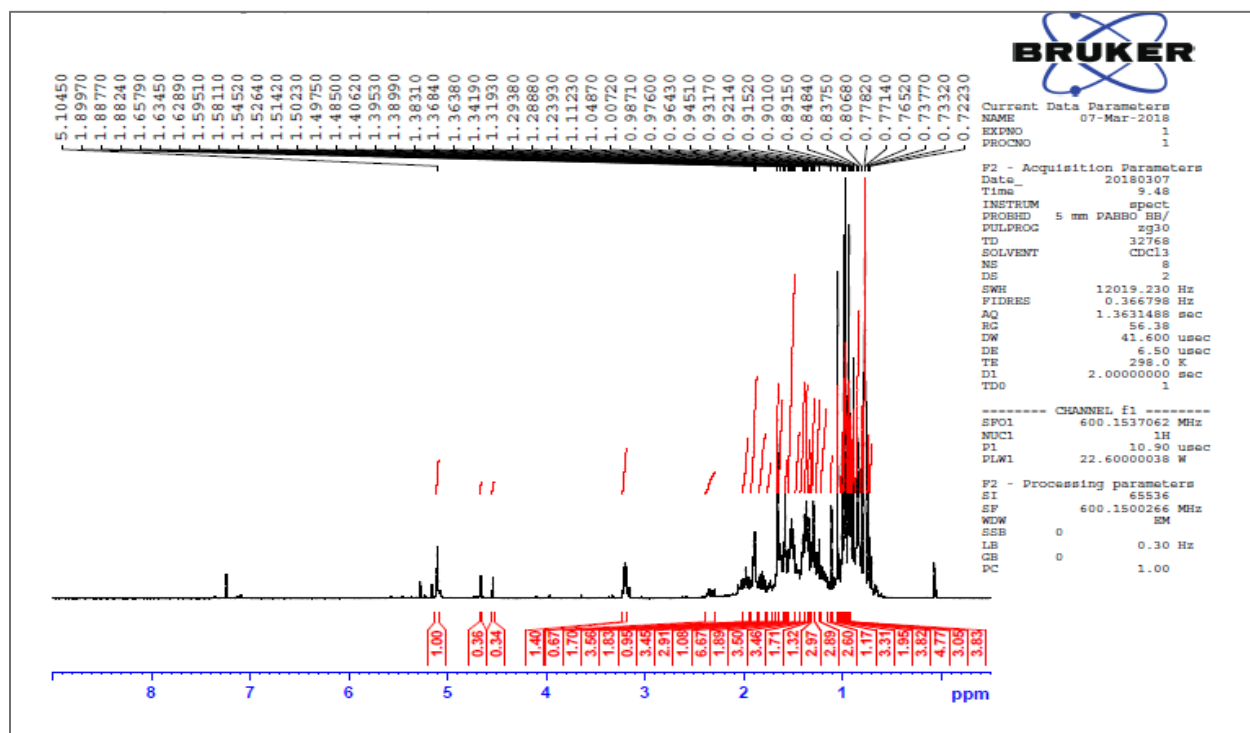

**Figure S46.** <sup>1</sup>H-NMR (600 MHz, CDCl<sub>3</sub>) of compound **16**

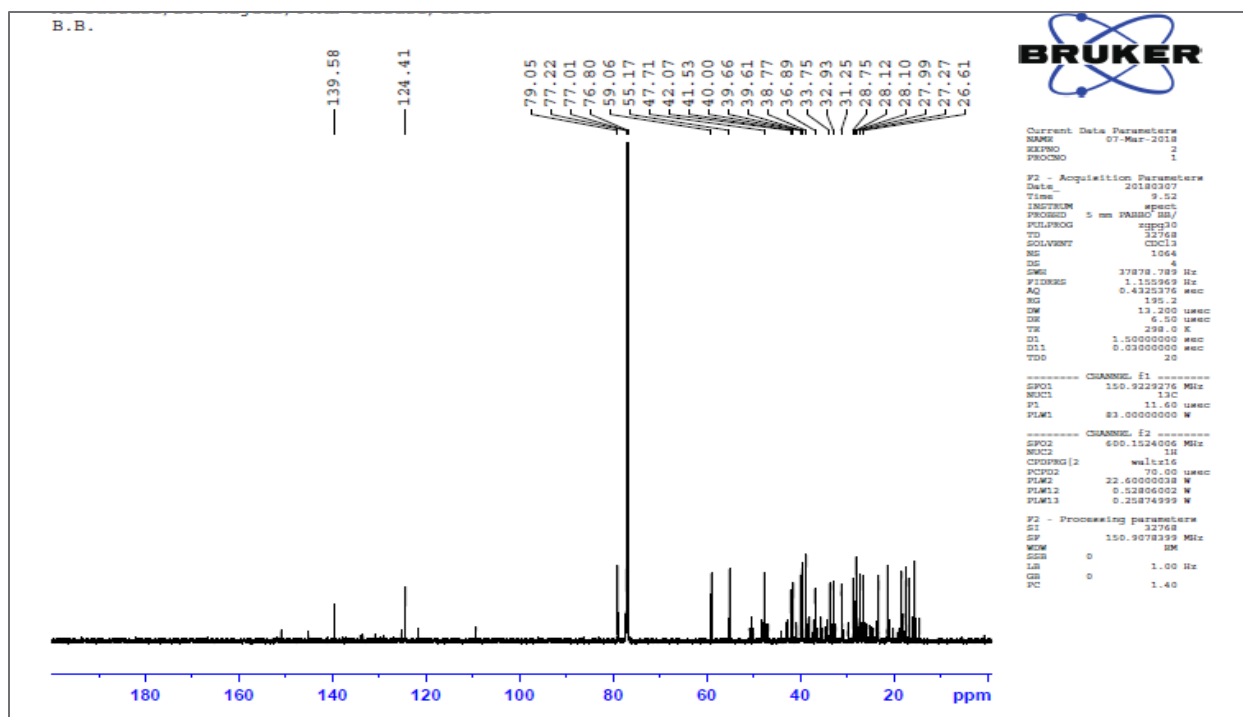

**Figure S47.**  $^{13}\text{C}$ -NMR (150 MHz,  $\text{CDCl}_3$ ) of compound **16**

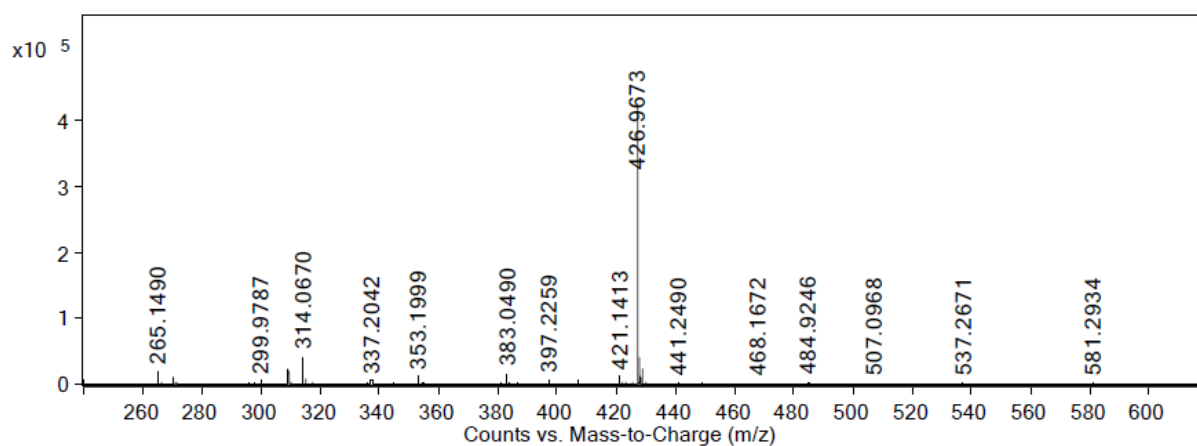

**Figure S48.** HRMS ( $\text{ESI}^+$ ) of compound **16**

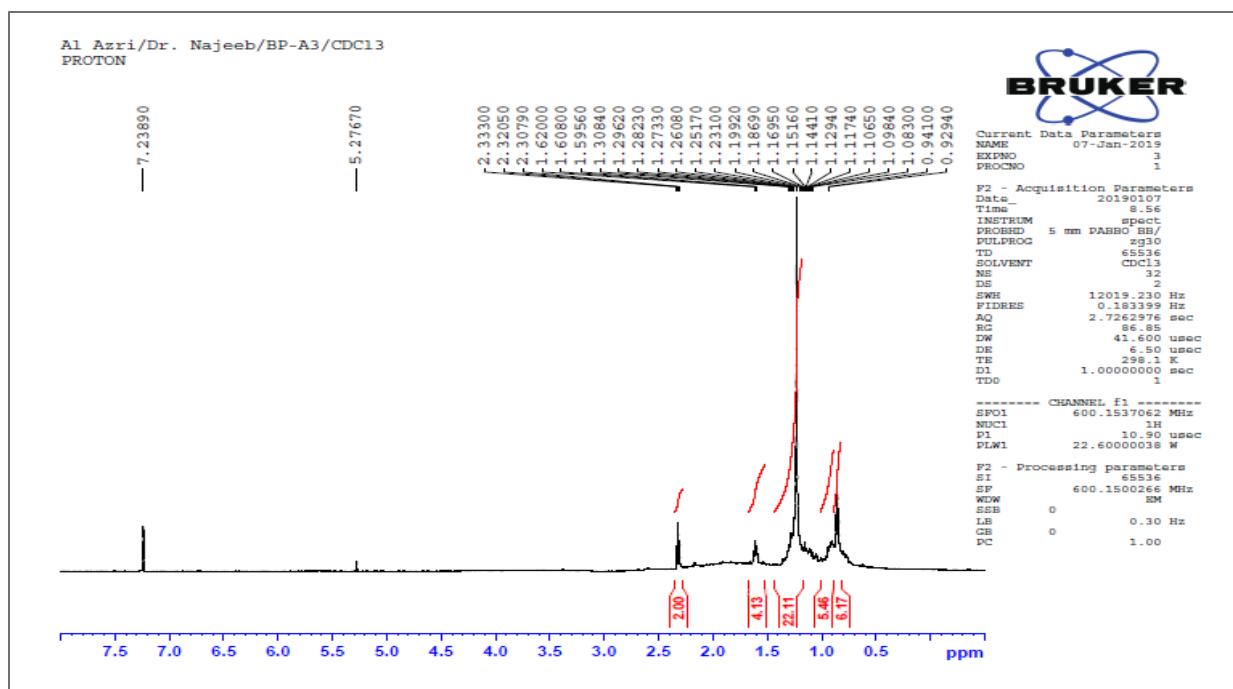

**Figure S49.**  $^1\text{H}$ -NMR (600 MHz,  $\text{CDCl}_3$ ) of compound **17**

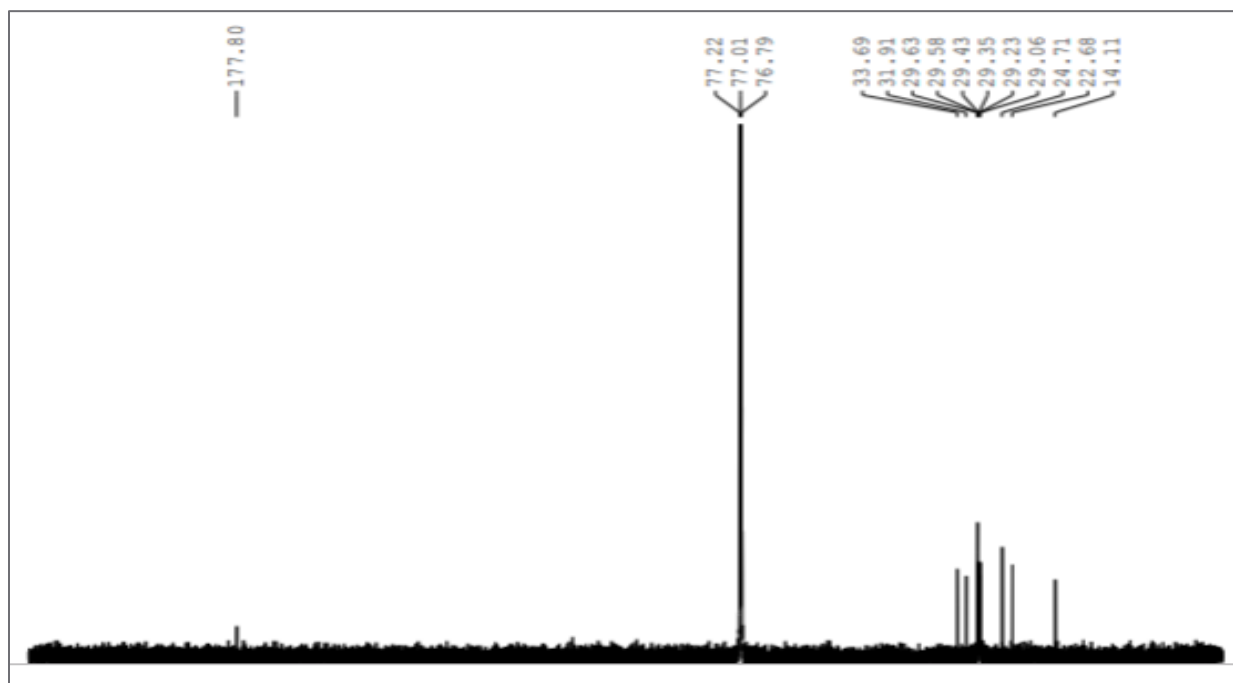

**Figure S50.**  $^{13}\text{C}$ -NMR (150 MHz,  $\text{CDCl}_3$ ) of compound **17**

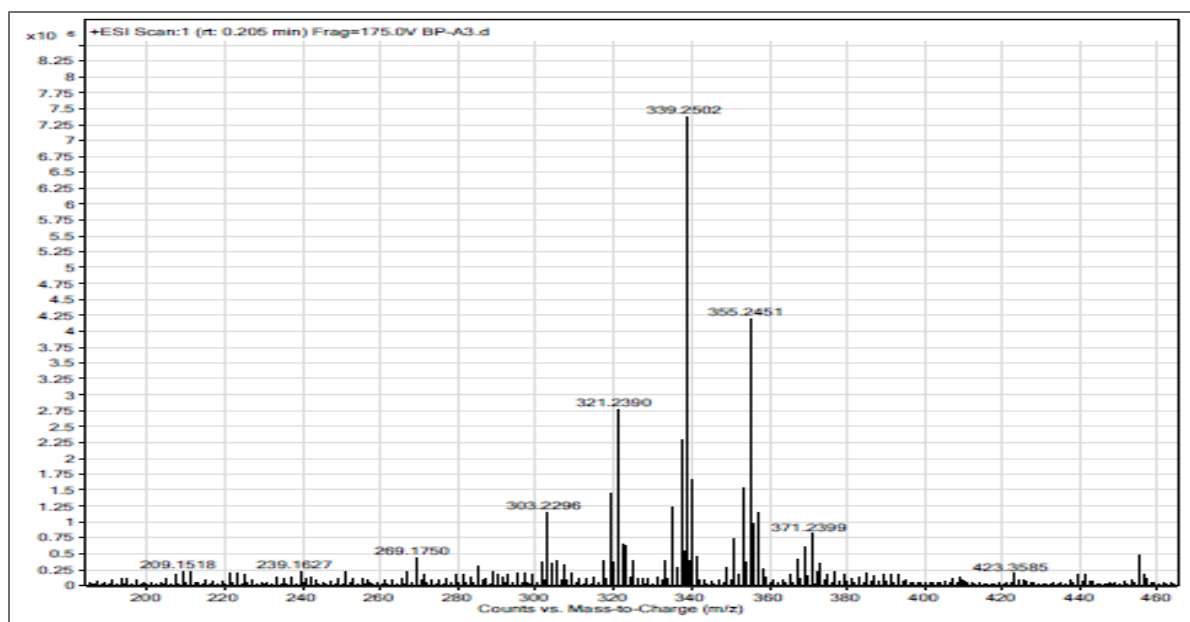

Figure S51. HRMS (ESI<sup>+</sup>) of compound 17

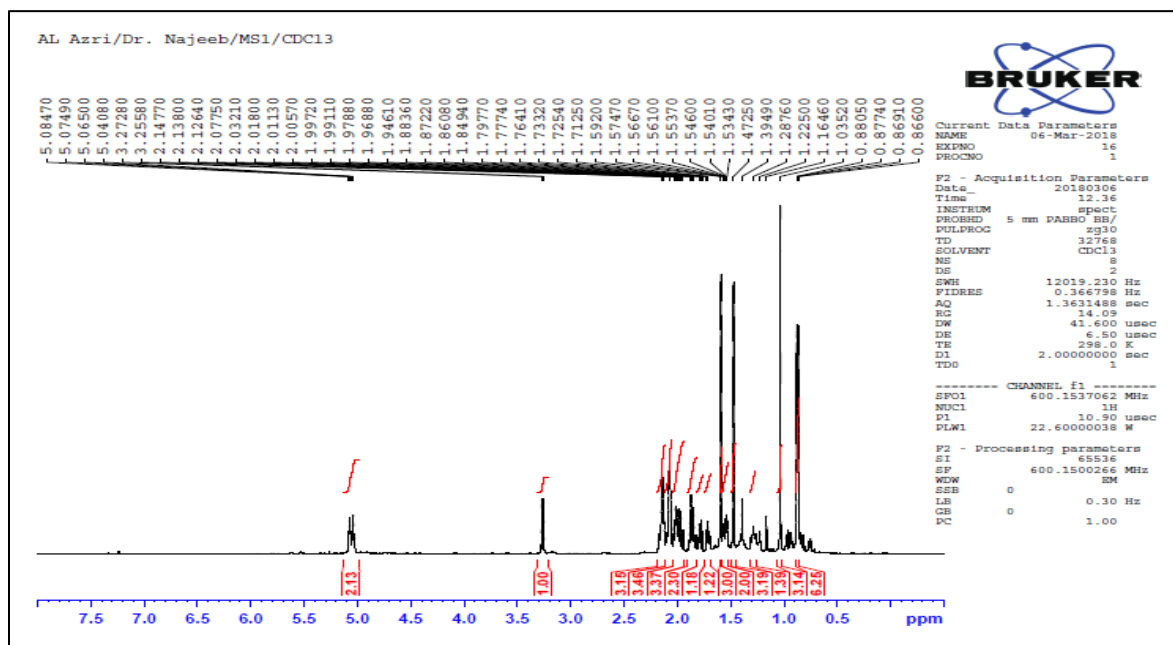

Figure S52. <sup>1</sup>H-NMR (600 MHz, CDCl<sub>3</sub>) of compound 18

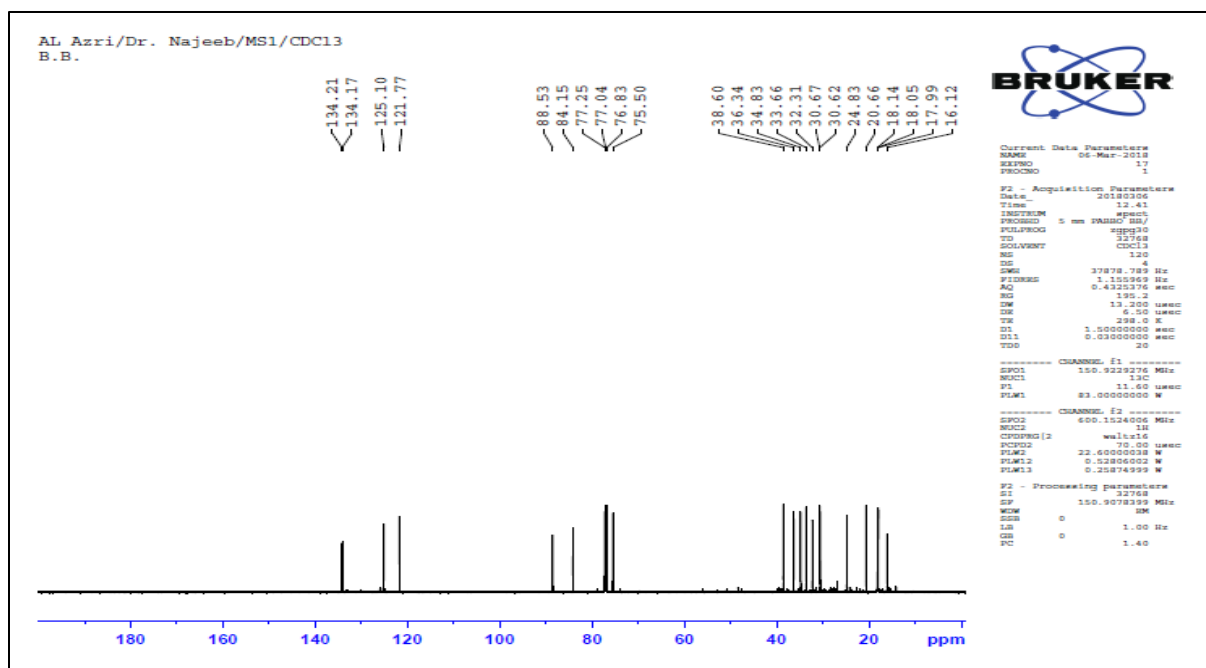

**Figure S53.**  $^{13}\text{C}$ -NMR (150 MHz,  $\text{CDCl}_3$ ) of compound **18**

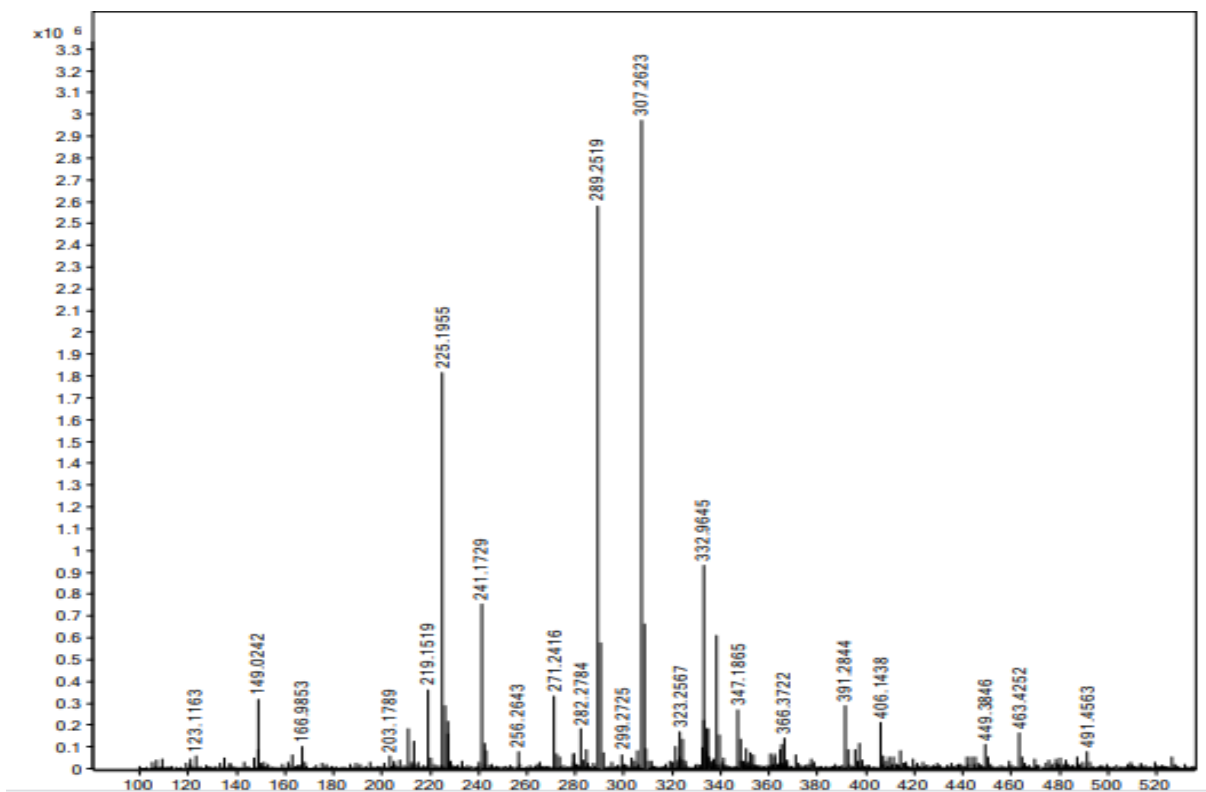

**Figure S54.** ESI-MS (positive) of compound **18**

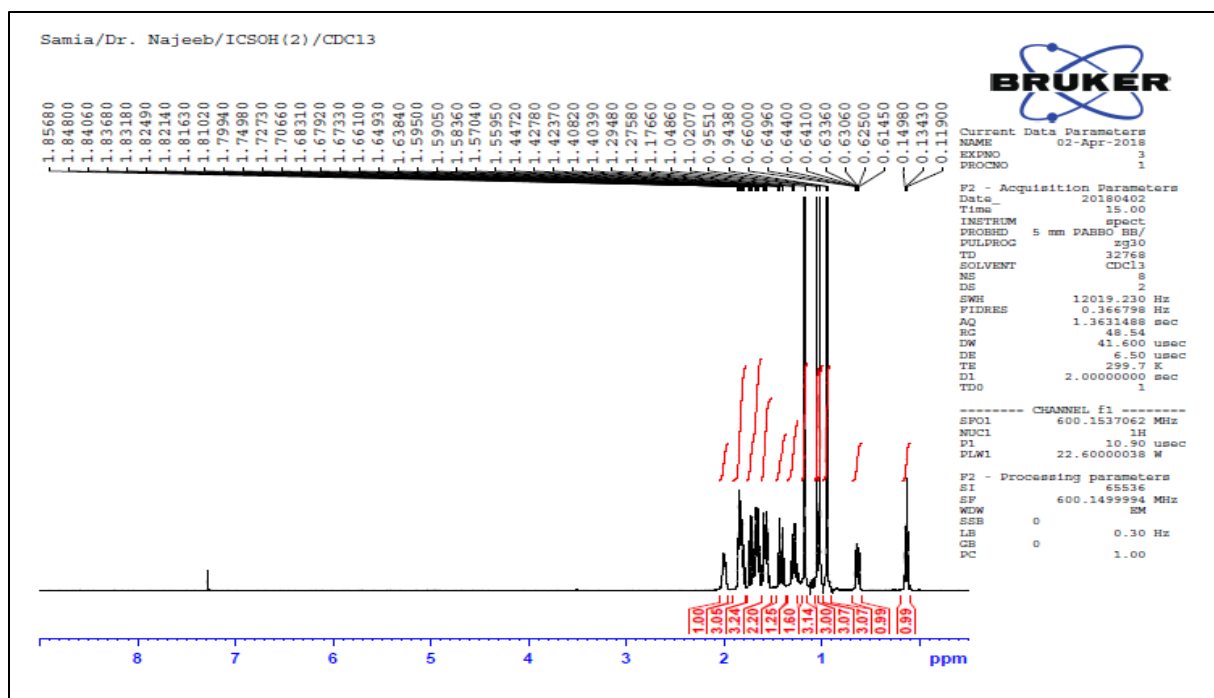

Figure S55. <sup>1</sup>H-NMR (600 MHz, CDCl<sub>3</sub>) of compound **19**

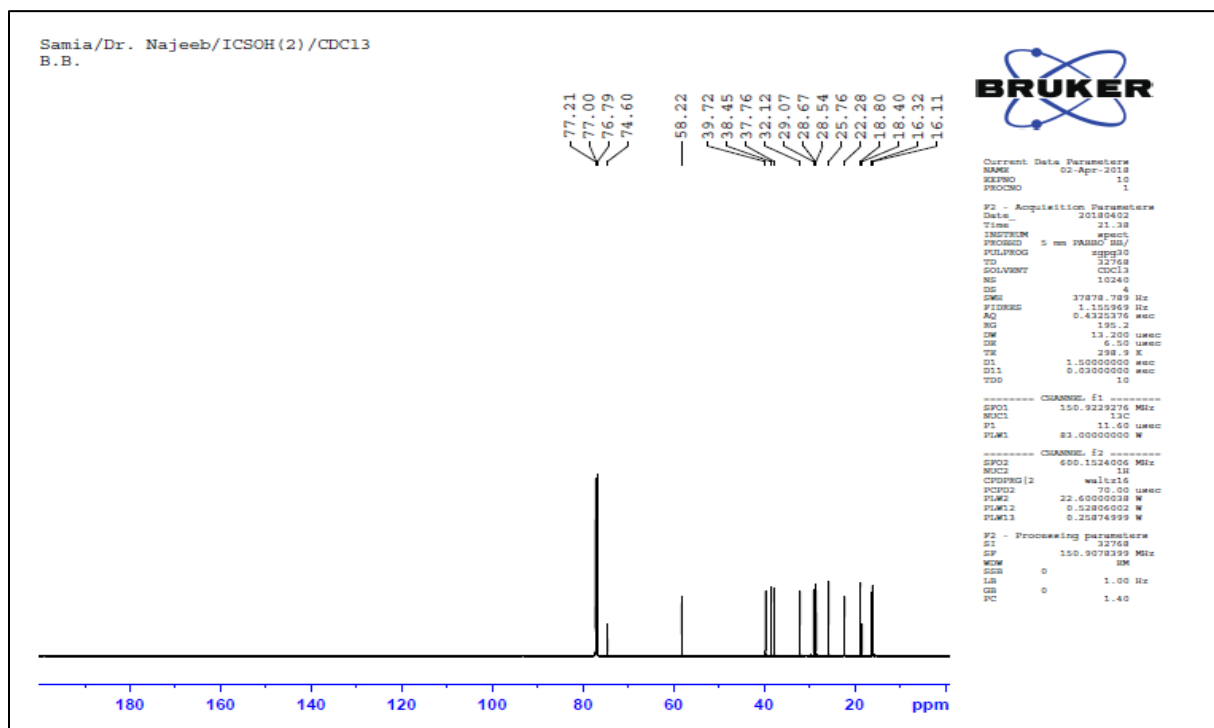

Figure S56. <sup>13</sup>C-NMR (150 MHz, CDCl<sub>3</sub>) of compound **19**

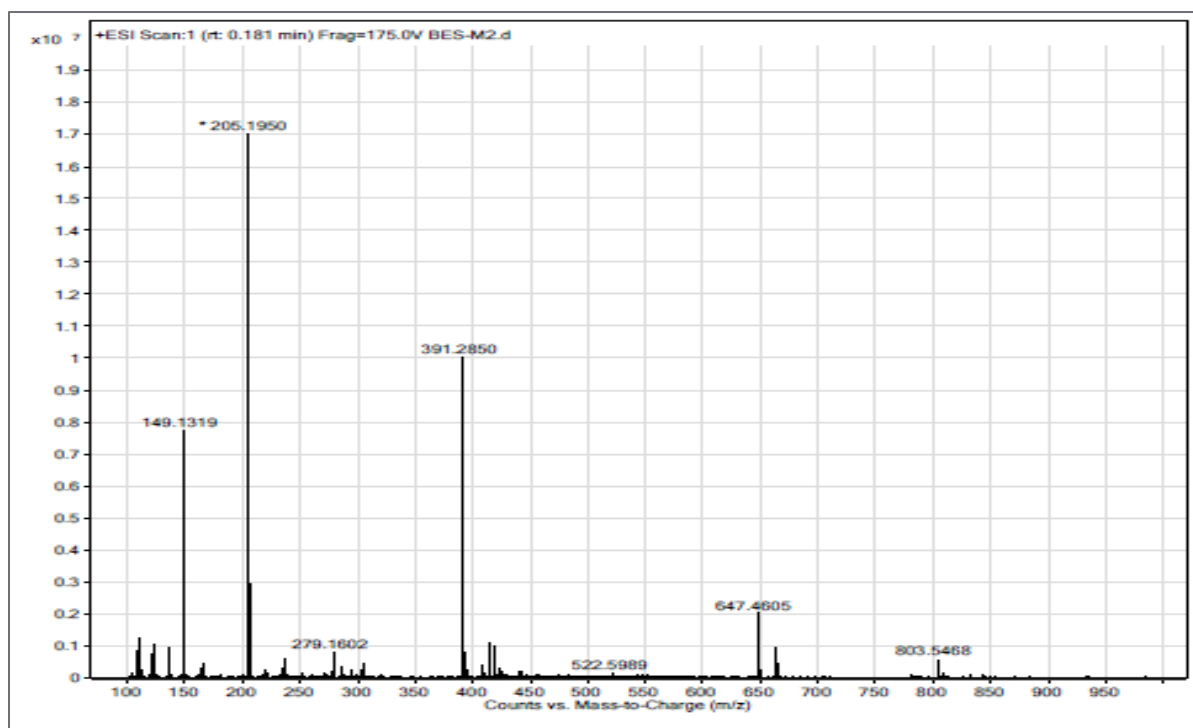

**Figure S57.** HRMS (ESI<sup>+</sup>) of compound **19**

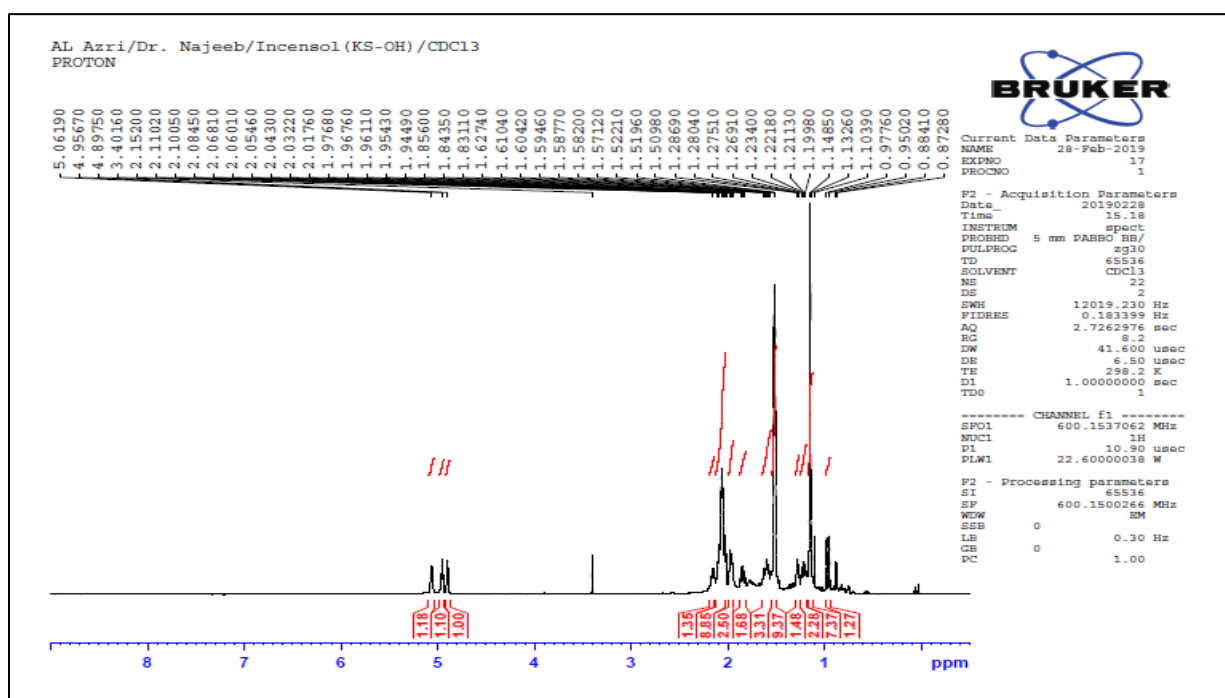

**Figure S58.** <sup>1</sup>H-NMR (600 MHz, CDCl<sub>3</sub>) of compound **20**

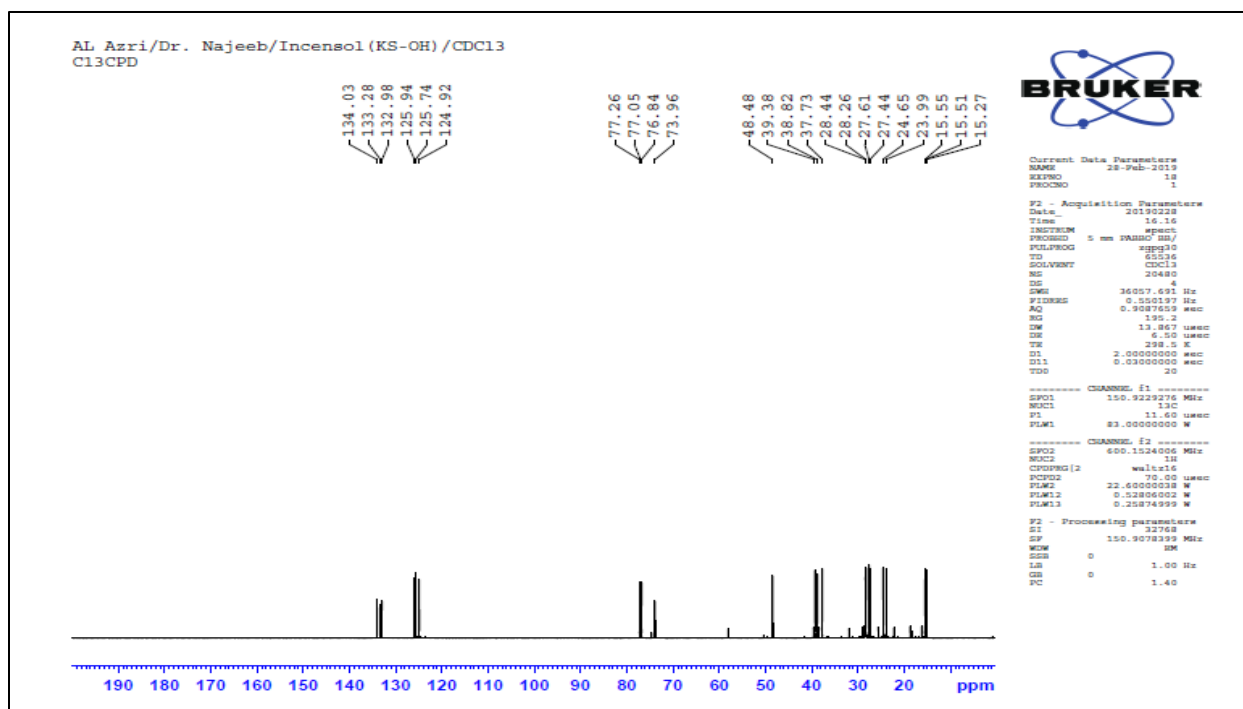

**Figure S59.** <sup>13</sup>C-NMR (150 MHz, CDCl<sub>3</sub>) of compound **20**

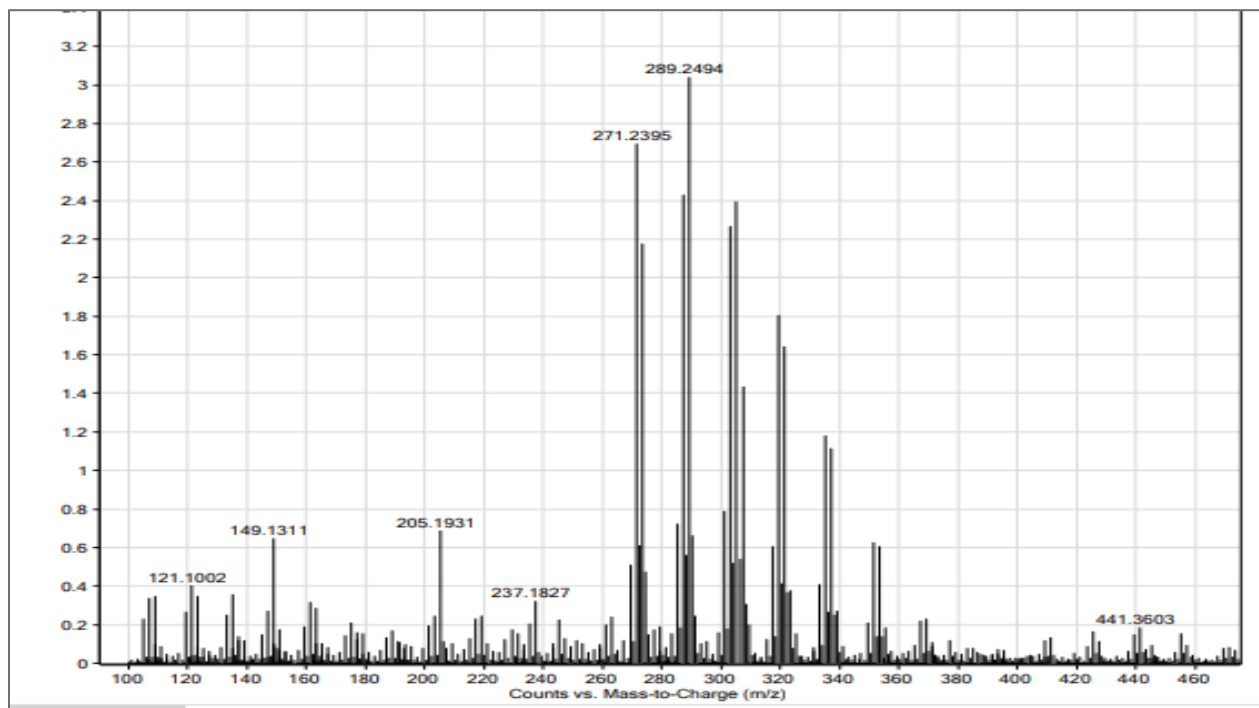

**Figure S60.** HRMS (ESI<sup>-</sup>) of compound **20**

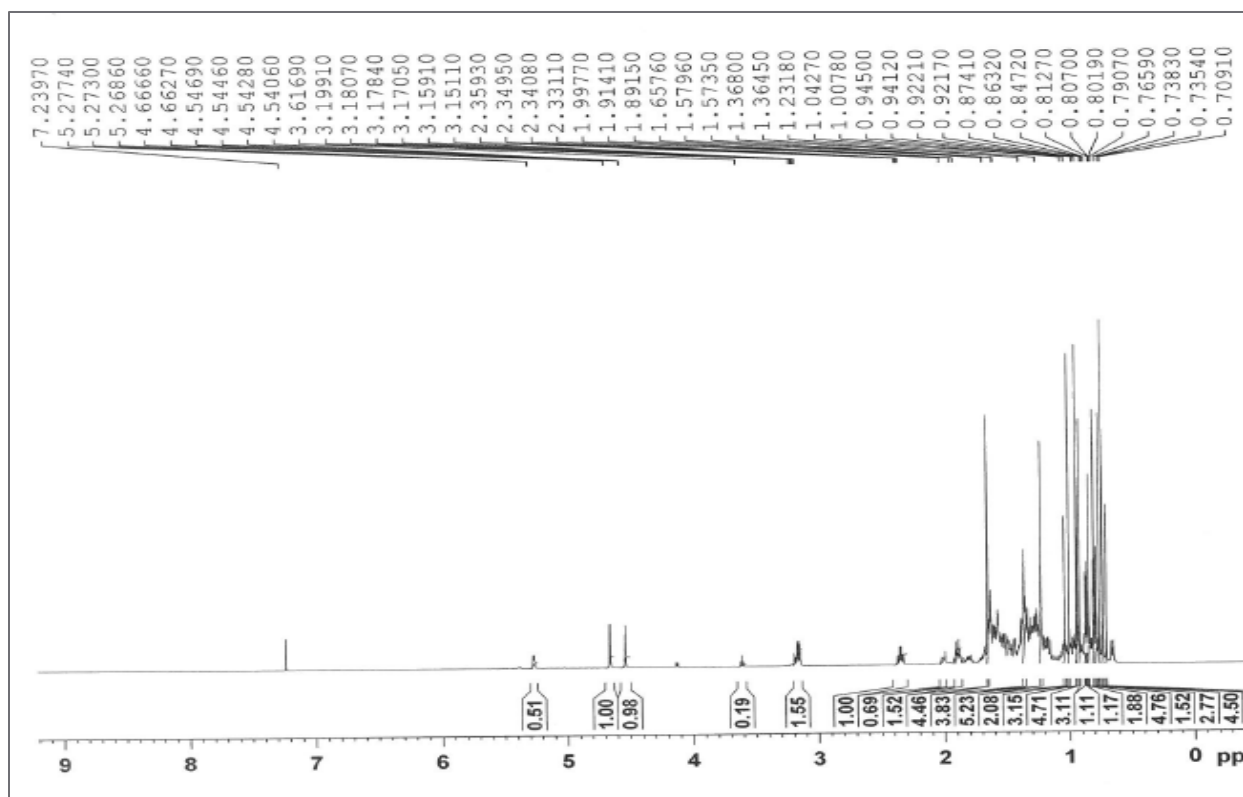

**Figure S61.** <sup>1</sup>H-NMR (600 MHz, CDCl<sub>3</sub>) of compound **21**

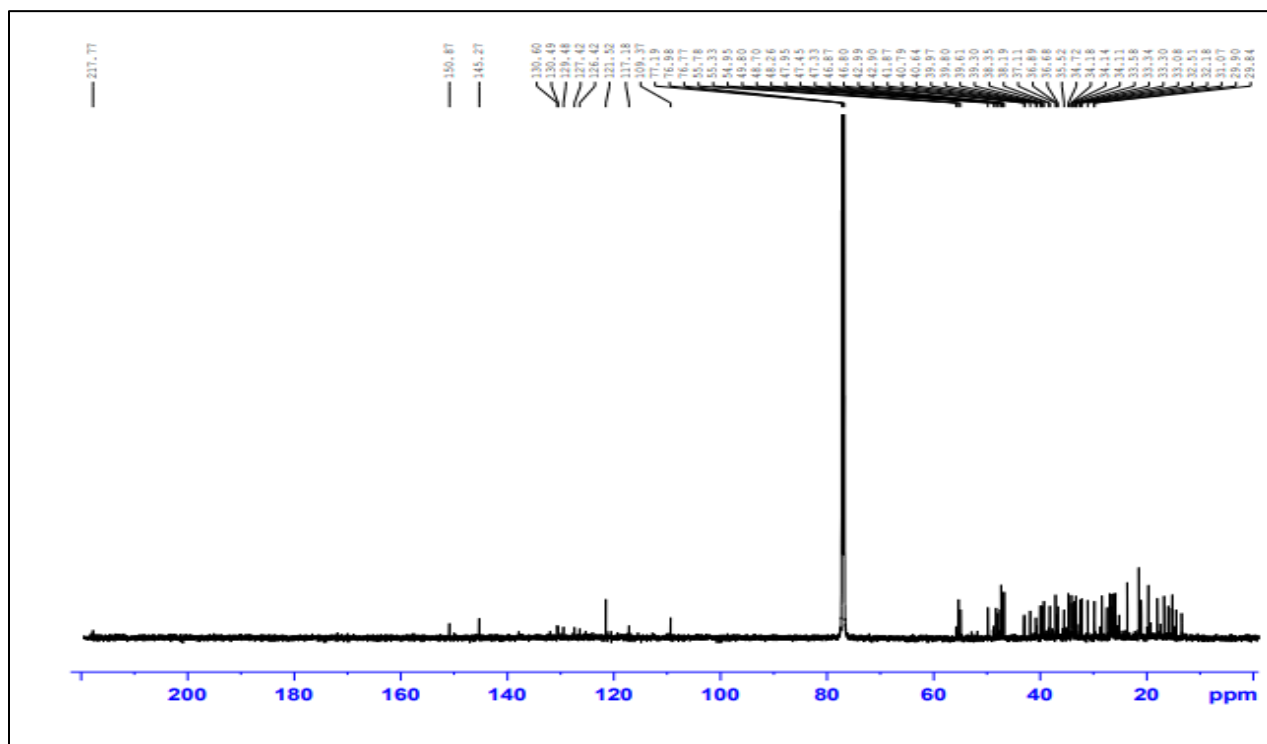

**Figure S62.** <sup>13</sup>C-NMR (150 MHz, CDCl<sub>3</sub>) of compound **21**

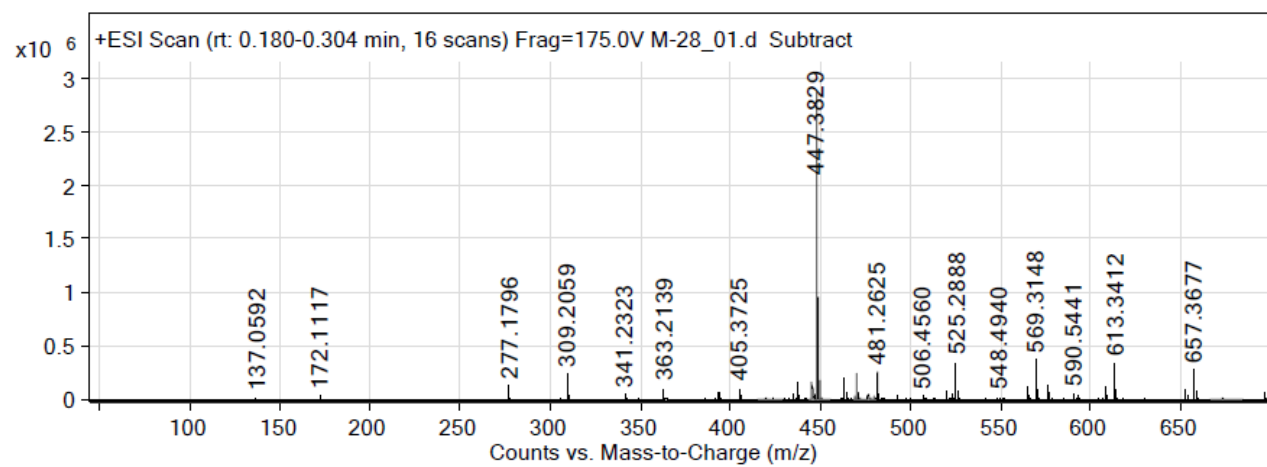

**Figure S63.** HRMS (ESI<sup>+</sup>) of compound **21**
